# Supplementary material
Source: PubMed Central journal article supplement (PMC7729589)
Supplement: jama-e2023370-s001.pdf [file jama-e2023370-s001.pdf]

1

2 **This supplement contains the following items:**

3 1. Original protocol (Page 2 – 44), final protocol (Page 45 –89),  
4 amendment list (Page 90– 94).

5 2. Original statistical analysis plan (Page 95–106), final statistical  
6 analysis plan (Page 107 – 118), amendment list (Page 119– 120).

7

8

9

10 **A multicenter, phase III randomized study**  
11 **of metronomic capecitabine maintenance**  
12 **after standard treatment in patients with**  
13 **operable triple–negative breast cancer**

14  
15 (Protocol code: SYSUCC–EBC–CHEMO–001)

16 (Coding description: Sun Yat–sen University Cancer Center–Early  
17 Breast Cancer–Chemotherapy–001)

18 Version: 1.0

19  
20  
21  
22 Principle Investigators

23 Zhong Yu YUAN, M.D. and Xi WANG, M.D.

24 Sun Yat–sen University Cancer Center

25  
26  
27  
28 Date of approved version: April 05, 2010

29

30  
31  
32  
33  
34  
35  
36  
37  
38  
39  
40  
41  
42  
43  
44  
45  
46  
47  
48  
49  
50  
51  
52  
53  
54  
55  
56  
57  
58  
59  
60  
61  
62

## Table of Contents

|                                                    |    |
|----------------------------------------------------|----|
| 1. Synopsis of the study.....                      | 5  |
| 1.1 Objectives.....                                | 5  |
| 1.2 Study Design.....                              | 5  |
| 1.3 Main Inclusion/ Exclusion Criteria.....        | 5  |
| 1.4 Investigational Drug and Administration.....   | 7  |
| 1.5 Study Endpoints.....                           | 8  |
| 2. Background.....                                 | 8  |
| 3. Objectives.....                                 | 12 |
| 3.1 Primary Endpoint.....                          | 12 |
| 3.2 Secondary Endpoints.....                       | 13 |
| 4. Study design.....                               | 14 |
| 4.1 Summary of Design.....                         | 14 |
| 4.2 Randomization.....                             | 16 |
| 4.3 Capecitabine Administration.....               | 17 |
| 4.3.1 Initiating Dose.....                         | 17 |
| 4.4.2 Dose Adjustment.....                         | 18 |
| 4.3.3 Concomitant and Prophylactic Medication..... | 20 |
| 5. Selection of Subjects.....                      | 21 |
| 5.1 Enrollment.....                                | 21 |
| 5.2 Inclusion Criteria.....                        | 21 |
| 5.3 Exclusion Criteria.....                        | 22 |
| 5.4 Discontinuation Criteria.....                  | 23 |
| 6. Study Protocol.....                             | 24 |
| 6.1 Study Drug.....                                | 24 |
| 6.2 Assessment and Follow-up.....                  | 24 |
| 6.2.1 Baseline assessment.....                     | 24 |
| 6.2.2 Assessment during Treatment.....             | 25 |
| 6.2.3 Assessment during Follow-up.....             | 26 |
| 6.2.4 Follow-up.....                               | 26 |
| 7. Safety Assessment.....                          | 28 |

|    |                                                 |    |
|----|-------------------------------------------------|----|
| 63 | 7.1. Adverse Events.....                        | 28 |
| 64 | 7.1.1 Definition of Adverse Events.....         | 28 |
| 65 | 7.1.2 Severity of Adverse Events.....           | 28 |
| 66 | 7.1.3 Association between Adverse Events        |    |
| 67 | and Study Treatment.....                        | 29 |
| 68 | 7.2. Serious Adverse Events.....                | 30 |
| 69 | 7.2.1 Definition of Serious Adverse Events..... | 30 |
| 70 | 7.2.2 Serious Adverse Event Reporting.....      | 31 |
| 71 | 8. Statistics.....                              | 31 |
| 72 | 8.1 Statistical Methods.....                    | 31 |
| 73 | 8.2 Sample Size.....                            | 32 |
| 74 | 9. Ethics.....                                  | 33 |
| 75 | 9.1 Informed Consent.....                       | 33 |
| 76 | 9.2 Ethic Policies and Regulations.....         | 34 |
| 77 | 9.3 Protocol Modifications.....                 | 34 |
| 78 | 10. Quality Assurance.....                      | 35 |
| 79 | 11. Data Processing and Storage.....            | 35 |
| 80 | 11.1 Case Report Form (CRF) .....               | 35 |
| 81 | 11.2 Database Establishment.....                | 36 |
| 82 | 11.3 Data Storage.....                          | 36 |
| 83 | 12. References.....                             | 37 |
| 84 | 13. Appendix 1 Schedule of Study.....           | 42 |
| 85 | 14. Appendix 2 Common Terminology Criteria for  |    |
| 86 | Adverse Events v4.0.....                        | 44 |
| 87 |                                                 |    |
| 88 |                                                 |    |
| 89 |                                                 |    |
| 90 |                                                 |    |

91

## 92 **1. SYNOPSIS OF THE STUDY**

### 93 **1.1 Objectives**

94 This study is designed to compare the efficacy (disease-free  
95 survival, DFS) and safety of metronomic capecitabine maintenance  
96 for one year with observation after standard local and systemic  
97 treatment in patients with operable triple negative breast cancer  
98 (TNBC).

99

### 100 **1.2 Study Design**

101 This study is to be a multi-center, phase III, randomized controlled  
102 trial. The study will include the following two treatment arms: 684  
103 subjects will be randomized in a 1:1 fashion (342 in each arm) to  
104 receive either metronomic capecitabine maintenance (experimental  
105 arm) or observation (control arm) until objective disease recurrence,  
106 protocol violation, intolerable toxicity, death, or withdrawal of  
107 consent. Subjects will be stratified by lymph node status (positive or  
108 negative). Subjects discontinuing from the active treatment phase  
109 will enter the follow-up phase during which survival information will  
110 be collected.

111

### 112 **1.3 Main Inclusion/ Exclusion Criteria**

113 **Main Inclusion Criteria:**

- 114 1) Female, aged  $\geq 18$  years old and  $\leq 75$  years.
- 115 2) Histologically confirmed invasive ductal carcinoma, no  
116 specific type (NOS).
- 117 3) Pathologic stage  $T_{1c-3}N_{0-2}M_0$ .
- 118 4) estrogen receptor (ER)–/progesterone receptor  
119 (PR)–negative and human epidermal growth factor receptor 2  
120 (HER2) negative (ER– and PR–negative is defined by lower  
121 than 1% immunohistochemistry staining; HER2–negative is  
122 defined by IHC score 0,1 or 2 with HER2–fluorescence in situ  
123 hybridization negative).
- 124 5) Have completed adequate surgery, neo–/adjuvant  
125 chemotherapy and radiation therapy (if indicated).
- 126 6) Available results for contralateral mammography, chest X–ray,  
127 abdominal ultrasonography,  $^{99m}Tc$ –bone scanning (required  
128 for patients with stage II b–IIIa disease) within 3 months  
129 before randomization.
- 130 7) Adequate organ function including bone marrow, renal  
131 function, hepatic function, et al.
- 132 8) Compliance with the study protocol.
- 133 9) Have provided written and signed informed consent.

134 **Main Exclusion Criteria:**

- 135 1) Patients with T4, including inflammatory carcinomas.
- 136 2) Patients with N3.
- 137 3) Previously diagnosed with other malignancies (not including  
138 cured cervical carcinoma *in situ*, cutaneous squamous cell  
139 carcinoma, and cutaneous basal cell carcinoma).
- 140 4) History of invasive breast cancer.
- 141 5) Patients who are receiving or will receive other biological  
142 agents or immunotherapy.
- 143 6) Severe dysfunction of the heart, lung, liver, or kidney.
- 144 7) Patients with malabsorption syndrome diseases impairing GI  
145 function, resection of stomach or small intestine, or who are  
146 unable to swallow capecitabine tablets.
- 147 8) Patients who are pregnant or who are unwilling to use  
148 contraception during the study period.
- 149 9) Known intolerance to capecitabine or allergy to its excipients.

150

151 **1.4 Investigational Drug and Administration**

152 Capecitabine group (experimental arm): Capecitabine will be  
153 administered at a dose of 650 mg/m<sup>2</sup> orally twice daily (ie, total  
154 daily dose = 1300 mg/m<sup>2</sup>) continuous for one year, starting within 2

155 weeks of randomization.

156

## 157 **1.5 Study Endpoints**

158 The primary efficacy parameter, DFS, will be analyzed in the full  
159 analysis set (FAS) population.

160 The secondary efficacy parameters, including overall survival (OS),  
161 disease-free survival (DDFS), and locoregional recurrence-free  
162 survival (LRFS), will be analyzed in the FAS populations.

163 Safety and tolerability will be assessed using reporting of adverse  
164 events (AEs), graded according to NCI-CTC (version 4.0).

165

## 166 **2. BACKGROUND**

167 Breast cancer comprises a group of diseases that show genetic  
168 heterogeneity and biological diversity [1, 2], which could be  
169 classified into five subtypes distinguished by their gene expression  
170 profiles [3, 4], including luminal A, luminal B, HER2+, normal breast,  
171 and basal-like [5]. The genotype of breast cancer is established  
172 using complicated gene analysis, which unsuitable for formalin-  
173 fixed specimens. Immunohistochemistry-based classification  
174 (using ER, PR, HER2, and KI-67) is more widely used in clinical  
175 practice [6-8], revealing a group of breast cancers characterized by



176 negative expression of ER, PR, and HER2, termed as  
177 “triple–negative” breast cancer (TNBC) [9]. Basal–like breast  
178 cancer and TNBC are differently defined, and might overlap with  
179 each other. The majority of basal–like breast cancers are  
180 triple–negative. Therefore, TNBC is used as an alternative  
181 histopathological definition of basal–like breast cancer in clinical  
182 practice, as well as in the inclusion criteria of most clinical trials.

183 TNBC comprises approximately 15%–25% of breast cancer in  
184 women [10–14], and is considered an independent  
185 clinicopathological subtype, with special clinical, pathological, and  
186 molecular genetic characteristics. In terms of clinical characteristics,  
187 TNBC is more common among young patients, with a high risk of  
188 early (within 2 years after surgery) recurrence, distant metastasis,  
189 and death [15–19]. TNBC has a shorter median survival after first  
190 recurrence than other types of breast cancer, with most deaths  
191 occurring within the first 5 years [10]. Visceral metastasis  
192 (especially in the lung and brain) is more frequent than bone  
193 metastasis, which might be one of the major contributors to the  
194 poor prognosis of TNBC. Pathologically, TNBC is associated with  
195 the presence of high histological grade, invasive ductal carcinoma,  
196 a high proliferation index, and high expression of p53 and EGFR

197 [20-24]. Molecularly, gene expression profiles of TNBC have  
198 revealed its high molecular homology [1, 4, 9].

199 For hormone receptor positive breast cancer, anti-estrogen  
200 therapies have significantly reduced recurrence and death [25]. For  
201 HER2+ breast cancers, anti-HER2 therapies (e.g., trastuzumab)  
202 have also significantly reduced recurrence [26]. Currently, there are  
203 few targeted therapies for TNBC, and chemotherapy is the only  
204 effective strategy to reduce recurrence, which is another reason for  
205 the poor prognosis of TNBC. Endocrine therapy for HR+ breast  
206 cancer and anti-HER2 therapy for HER2+ breast cancer are all  
207 long-term maintenance therapies after standard treatment [27].  
208 Therefore, we propose that a long-term effective maintenance  
209 treatment might significantly improve the outcome in patients with  
210 early TNBC.

211 Most TNBC is more chemosensitive than HR+ breast cancer.  
212 Traditional regimens tend to achieve a better response in patients  
213 with TNBC; however, the duration of the response usually does not  
214 last long. TNBC is still characterized with dismal DFS, PFS, and OS  
215 [14, 28, 29]. Therefore, the aggressive biological behavior and the  
216 lack of effective risk-reducing treatment have both contributed to  
217 the poor prognosis of TNBC.

218 Metronomic chemotherapy is a relatively novel regimen using  
219 continuous and low-dose chemotherapeutic agents with short or no  
220 intervals. Browder and Klement, et al. reported the anti-tumor  
221 activity of metronomic chemotherapy for the first time. The novel  
222 pattern of dosage has a different mechanism compared with  
223 conventional dosage regimens by exerting anti-angiogenesis  
224 effects [30, 31]. In addition, metronomic chemotherapy also  
225 produces antitumor effects by upregulating anti-tumor immune  
226 response in the host [32]. Metronomic chemotherapy had achieved  
227 good efficacy with low toxicity in advanced breast cancer [33–36].  
228 Considering that angiogenesis and immune surveillance escape  
229 are major mechanisms of tumor metastasis, metronomic  
230 chemotherapy might be a potential therapeutic option for operable  
231 TNBC with high risk of distant metastasis.

232 Capecitabine is an effective agent with good tolerability and is  
233 convenient for breast cancer [37–41], which makes it an optimal  
234 choice for long-term metronomic use. The most common adverse  
235 events of capecitabine include hand-foot syndrome (HFS),  
236 diarrhea, and stomatitis, which are non-life threatening and can be  
237 managed using education without impairing efficacy [40]. Two recent  
238 phase III trials (FinXX and USO), which enrolled all subtypes of

239 breast cancer, have shown by subgroup analysis that the addition  
240 of capecitabine to standard treatment significantly reduced the risk  
241 of relapse for TNBC, especially the risk of distant metastases.

242 In summary, high rate of distant metastases and lack of effective  
243 treatment are the major reasons for the poor prognosis of TNBC.  
244 As a novel model of treatment, metronomic chemotherapy might be  
245 effective for TNBC by targeting angiogenesis and immune escape.  
246 The good efficacy and tolerability of capecitabine make it an  
247 optimal drug for metronomic chemotherapy. Clinical studies have  
248 also demonstrated a reduced risk of relapse in patients with TNBC  
249 receiving capecitabine in addition to standard treatment. This study  
250 aims to evaluate the efficacy and safety of capecitabine  
251 metronomic chemotherapy after standard treatment in patients with  
252 early TNBC.

253

### 254 **3. OBJECTIVES**

#### 255 **3.1 Primary Endpoint**

256 To compare the DFS in patients who are randomized at enrollment  
257 to treatment with metronomic capecitabine maintenance  
258 (experimental arm) with in observation arm (control arm).

259 DFS is defined as time from randomization to the first of any of

260 the following events:

- 261 1) Relapse of invasive breast cancer in the ipsilateral chest wall  
262 and regional lymph nodes
- 263 2) Distant metastases (histologically confirmed or clinically  
264 diagnosed)
- 265 3) Breast cancer related, non–breast cancer related or unknown  
266 deaths
- 267 4) Contralateral invasive breast cancer.

268

### 269 **3.2 Secondary Endpoints**

270 To compare the overall survival (OS), distant disease–free survival  
271 (DDFS), locoregional recurrence–free survival (LRFS) and safety  
272 between the experimental arm and observation arm. In addition,  
273 exploratory analysis will include biomarkers that predict the efficacy  
274 and toxicity of capecitabine.

275 OS is defined as time from randomization to death caused by any  
276 reason.

277 DDFS is defined as time from randomization to the first  
278 occurrence of any of the following events: Distant metastases,  
279 death caused by any reason, and contralateral invasive breast  
280 cancer (NEJM 2005; 353:2747).

281 LRFS is defined as time from randomization to locoregional  
282 invasive recurrence or death.

283 Safety: The frequency and severity degree of AEs were judged  
284 based on NCI CTC V4.0.

285

## 286 **4. STUDY DESIGN**

### 287 **4.1 Summary of Design**

288 This is a multi-center, phase III, randomized controlled study of  
289 metronomic capecitabine maintenance versus observation.

290 Approximately 684 subjects with TNBC will be randomized in a  
291 1:1 fashion (342 in each arm) to receive treatment with either:  
292 Metronomic capecitabine maintenance (experimental arm); or  
293 observation (control arm) until objective disease recurrence,  
294 protocol violation, intolerable toxicity, death, or withdrawal of  
295 consent. Subjects will be stratified by lymph node status (positive or  
296 negative).

297 Subjects will participate in the study within 4 weeks after  
298 completion of standard curative treatment including surgery,  
299 neo-/adjuvant chemotherapy and radiotherapy. Patients in the two  
300 arms will be follow-up every 3 months using physical, laboratory,  
301 and radiological examinations according to the study protocol. This

302 study will be completed in approximately 72 months including 48  
 303 months for accrual and approximately 36 months of follow-up  
 304 survival for the last subject enrolled. An overview of the study  
 305 design is depicted below:

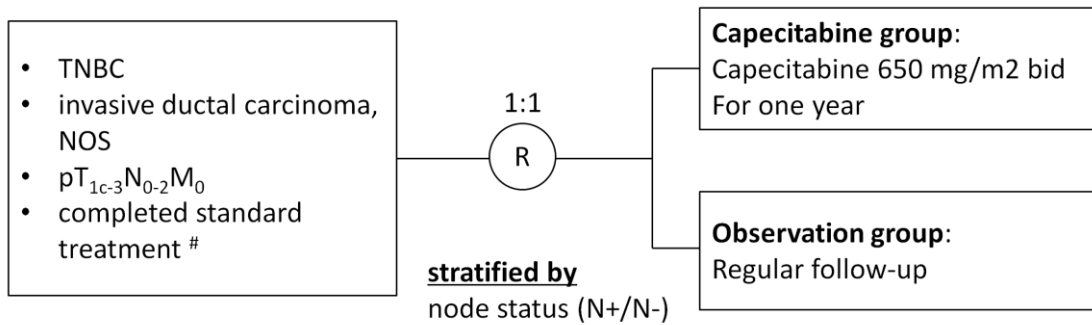

# standard treatment including surgery, (neo)adjuvant chemotherapy and radiation therapy (if indicated)

306  
307

308 **Recommended chemotherapy regimens:** According to the  
 309 NCCN guidelines version 2010, recommended chemotherapy  
 310 regimens and dosage are listed in Table 1. Dosages adjustment  
 311 according to a patient's toleration will be allowed with no more than  
 312 25% reduction of standard dose. A minimum of four cycles of  
 313 neo-/adjuvant chemotherapy should be delivered. For  
 314 node-positive patients, chemotherapy regimens containing  
 315 anthracyclines and taxanes are recommended.

316 Recommended indications for post-operative radiotherapy  
 317 include: Involvement of  $\geq$  four axillary nodes, primary tumor  $\geq$  5 cm  
 318 in size, post breast conserving surgery, positive surgical margins,

319 involvement of internal mammary nodes (in selected cases), and  
 320 involvement of 1–3 axillary nodes (in selected cases).

321 **Table 1** Recommended chemotherapy regimen and dosage

| Regimens(drugs) |                                                                     | Dose(mg/m <sup>2</sup> )   |
|-----------------|---------------------------------------------------------------------|----------------------------|
| CMF             | cyclophosphamide/methotrexate/fluorouracil                          | 500/ 40/ 600               |
| AC              | doxorubicin/cyclophosphamide                                        | 60/ 600                    |
| EC              | epirubicin/cyclophosphamide                                         | 75–90/ 600                 |
| FAC             | 5–fluorouracil/doxorubicin/cyclophosphamide                         | 500/ 50/ 500               |
| FEC             | 5–fluorouracil/epirubicin/cyclophosphamide                          | 500/ 75–90/ 500            |
| TAC             | docetaxel/doxorubicin/cyclophosphamide                              | 75/ 50/ 500                |
| TEC             | docetaxel/epirubicin/cyclophosphamide                               | 75/ 75/ 500                |
| AC–P            | doxorubicin/cyclophosphamide→paclitaxel weekly or every 3–weeks     | 60/ 600→80 (qw), 175 (q3w) |
| EC–P            | epirubicin/cyclophosphamide→paclitaxel weekly or every 3–weeks      | 90/ 600→80 (qw), 175 (q3w) |
| AC–wP           | doxorubicin/cyclophosphamide→paclitaxel (Dose–dense)                | 60/ 600→175 (q2w)          |
| FEC–T           | 5–fluorouracil/epirubicin/cyclophosphamide→docetaxel, every 3 weeks | 500/ 75–90/ 500→75         |
| TC              | docetaxel/cyclophosphamide                                          | 75/ 600                    |

322

## 323 4.2 Randomization

324 On verification of the inclusion and exclusion criteria, eligible  
 325 patients will be randomized using the method of stratified permuted  
 326 blocks to receive metronomic capecitabine maintenance or  
 327 observation in a 1:1 ratio. Patients will be stratified according to  
 328 lymph node status (negative vs. positive). A computerized number  
 329 generator in the SAS software (version 8.01) generate a  
 330 randomization table, the results of which were placed in  
 331 sequentially numbered opaque envelopes and remained concealed



332 until after enrollment.

333 Central randomization will be performed. When a suitable patient  
334 is to be enrolled into the study, the Investigator site will contact  
335 principal investigator (PI) site, and will be informed over the  
336 telephone at the time of individual patient enrollment what the  
337 treatment allocation is, and to which treatment arm the patient has  
338 been randomized. This is a multicenter study to be conducted at  
339 approximately 15 study sites.

340

### 341 **4.3 Capecitabine Administration**

#### 342 **4.3.1 Initiating Dose**

343 The approved dose of capecitabine was 1250 mg/m<sup>2</sup> bid, days  
344 1–14 every 21 days. However, the dose of capecitabine for  
345 metronomic chemotherapy is uncertain, particularly in the adjuvant  
346 setting. Several studies suggested that capecitabine at 650 mg/m<sup>2</sup>  
347 bid, continuously for one year in metastatic breast cancer had lower  
348 toxicity and was well tolerated [42–44]. The initiate dose of  
349 capecitabine was 650 mg/m<sup>2</sup> bid, continuously for one year.

350 Body surface area is calculated from height and body weight.  
351 Given that the height and weight of Chinese woman are 150–180  
352 cm and 40–80 kg, respectively, their body surface area lie between

353 1.30 m<sup>2</sup> and 2.0 m<sup>2</sup>. Combining the availability of capecitabine in  
354 China with the convenience of patients, the daily actual dose will be  
355 decided upon by using the **Table 2**.

356 **Table 2 The daily dose of capecitabine**

357

| Body surface area (m <sup>2</sup> ) | Total Daily Dose (mg) | Morning dose (mg) | Evening dose (mg) |
|-------------------------------------|-----------------------|-------------------|-------------------|
| 1.30–1.32                           | 1690–1716             | 1000              | 500               |
| 1.33–1.71                           | 1729–2223             | 1000              | 1000              |
| 1.72–2.0                            | 2236–2600             | 1500              | 1000              |

358

#### 359 **4.3.2 Dose Adjustment**

360 The most common AEs of capecitabine is HFS, and grading of HFS  
361 is listed in **Table 3**. Studies suggested that almost all AEs could  
362 improve after dose modification [45]. Dose adjustment of  
363 capecitabine in patients who experience HFS is listed in **Table 4**.  
364 Note, because of lower dose in patients with body surface areas  
365 1.3–1.32 m<sup>2</sup>, only one dose reduction of capecitabine is allowed,  
366 from 1500 mg to 1000mg (morning 500mg, evening 500mg). In  
367 addition, once a dose has been reduced for a subject, all  
368 subsequent doses should be administered at that dose, unless  
369 further dose reduction is required. Dose reescalation is not  
370 permitted. If dosage delay occurs because of AEs, whether to  
371 continue treatment should be determined by the investigator by

372 balancing the benefit and risk on an individual basis. Regardless of  
 373 the cause of the delay, patients who discontinue dosage for more  
 374 than 4 weeks should terminate treatment and withdraw from the  
 375 trial.

376 **Table 3 Grading of HFS Caused by Capecitabine**

| Grade | Manifestation                                                                                                                             |
|-------|-------------------------------------------------------------------------------------------------------------------------------------------|
| 1     | Numbness, tingling sensation, erythema of hands and/or feet that cause painless swelling or discomfort without affecting daily activities |
| 2     | Painful erythema or swelling of hands and/or feet that affect daily activities                                                            |
| 3     | Wet desquamation, ulceration, blistering, severe pain of hands and/or feet, and/or unable to work or perform daily activities             |

377  
 378  
 379

**Table 4 Dose Adjustment of Capecitabine**

| Grade | Dose modification of capecitabine                                                                                                                                                                                                                                                                                                                                                                                                                                                                                            |
|-------|------------------------------------------------------------------------------------------------------------------------------------------------------------------------------------------------------------------------------------------------------------------------------------------------------------------------------------------------------------------------------------------------------------------------------------------------------------------------------------------------------------------------------|
| 1     | Dose modifications are not recommended                                                                                                                                                                                                                                                                                                                                                                                                                                                                                       |
| 2     | <ul style="list-style-type: none"> <li>–First appearance: Interrupt therapy until resolved to grade 0 or 1 and maintain the dose level for the next treatment at 100%</li> <li>–Second appearance: Interrupt therapy until resolved to grade 0 or 1 and maintain the dose level for the next treatment at 75%</li> <li>–Third appearance: Interrupt therapy until resolved to grade 0 or 1 and maintain the dose level for the next treatment at 50%</li> <li>–Fourth appearance: Discontinue therapy permanently</li> </ul> |
| 3     | <ul style="list-style-type: none"> <li>–First appearance: Interrupt therapy until resolved to grade 0 or 1 and begin the next cycle at 75% of the starting dose</li> <li>–Second appearance: Interrupt therapy until resolved to grade 0 or 1 and begin the next cycle at 50% of the starting dose</li> <li>–Third appearance: Discontinue therapy permanently</li> </ul>                                                                                                                                                    |
| 4     | First appearance: Discontinue therapy permanently, or if the physician                                                                                                                                                                                                                                                                                                                                                                                                                                                       |

|  |                                                                                                                                                          |
|--|----------------------------------------------------------------------------------------------------------------------------------------------------------|
|  | deems it to be in the patient's best interest to continue, interrupt until resolved to grade 0 or 1 and begin the next cycle at 50% of the starting dose |
|--|----------------------------------------------------------------------------------------------------------------------------------------------------------|

380

### 381 **4.3.3 Concomitant and Prophylactic Medication**

382 In addition to HFS, the other common toxicities of capecitabine are  
383 diarrhea and stomatitis. Symptom-relieving treatment can be given  
384 by investigators according to clinical need and should be recorded.  
385 Dose adjustment is not required for patients with mild to moderate  
386 hepatic impairment. Currently there are no data on the  
387 pharmacokinetics of capecitabine in patients with renal dysfunction  
388 (as evaluated by serum creatinine levels).

389 Mild myelosuppression related to capecitabine and the  
390 predominance of its active metabolic enzymes inside tumor cells  
391 mean that, hematologic toxicities of grade  $\leq 2$  can be managed  
392 according to clinical routine without discontinuation of capecitabine.  
393 For patients experiencing hematologic toxicities of grade  $\geq 3$ ,  
394 capecitabine should be interrupted until resolved to grade 0.  
395 Treatment should be terminated if dosage interruption occurs for  
396 more than 4 weeks. Treatment should be terminated if patients  
397 experience two episodes of grade  $\geq 3$  hematological toxicities  
398 consecutively, with any episode resulting in drug discontinuation for  
399 more than 2 weeks. Patient should be followed-up after termination

400 of therapy and toxicities and prognosis should be recorded.

401

## 402 **5. SELECTION OF SUBJECTS**

### 403 **5.1 Enrollment**

404 All patients meeting the inclusion criteria must be provided with  
405 detailed information about this study and written informed consent  
406 for participation must be obtained. The patients will then be  
407 randomly assigned into the observation arm or capecitabine arm  
408 using a random number table, and the assignment will be recorded  
409 on the case report form (CRF) by investigators. Analysis will be  
410 stratified by lymph node status (N0 or N+).

411

### 412 **5.2 Inclusion Criteria**

413 Patients must fulfill **ALL** of the following criteria to be eligible for  
414 study  
415 enrollment and randomization.

- 416 1) Female, aged  $\geq 18$  years old and  $\leq 75$  years old.
- 417 2) Histologically confirmed invasive ductal carcinoma, no  
418 specific type (NOS).
- 419 3) Pathologic stage  $T_{1c-3}N_{0-2}M_0$ .
- 420 4) ER-, PR-, and HER2-negative (ER- and PR-negative is

421 defined by lower than 1% immunohistochemistry (IHC)  
422 staining; HER2 negative is define by an IHC score of 0, 1 or 2,  
423 with HER2–fluorescence *in situ* hybridization negative).

424 5) Have completed adequate surgery, neo-/adjuvant  
425 chemotherapy and radiation therapy (if indicated).

426 6) Available results of contralateral mammography, chest X–ray,  
427 abdominal ultrasonography, and <sup>99m</sup>Tc–bone scanning within 3  
428 months before randomization.

429 7) Adequate organ function:

430 a) Bone marrow: ANC  $\geq 1.5 \times 10^9/L$ ; platelet count  $\geq$   
431  $100 \times 10^9/L$ ; hemoglobin  $\geq 10$  g/dL

432 b) Renal function: Serum creatinine  $\leq 1.5 \times ULN$  by local  
433 laboratory

434 c) Hepatic function: Total bilirubin  $\leq 1.5 \times ULN$ ; AST  $\leq$   
435  $1.5 \times ULN$ , ALT  $\leq 1.5 \times ULN$

436 8) Compliance with study protocol.

437 9) Providing written and signed informed consent.

438

### 439 **5.3 Exclusion Criteria**

440 Patients meeting **ANY** of the following criteria are not eligible for  
441 study enrollment and randomization.

- 442 1) Patients with T4, including inflammatory carcinomas.
- 443 2) Patients with N3.
- 444 3) Previously diagnosed other malignancies (not including cured  
445 cervical carcinoma in situ, cutaneous squamous cell  
446 carcinoma, and cutaneous basal cell carcinoma).
- 447 4) History of invasive breast cancer.
- 448 5) Patients who are receiving or will receive other biological  
449 agents or immunotherapy.
- 450 6) Severe dysfunction of the heart, lung, liver, or kidney.
- 451 7) Patients with malabsorption syndrome diseases impairing GI  
452 function, resection of stomach or small intestine, or unable to  
453 swallow capecitabine tablets.
- 454 8) Patient who are pregnant or who are unwilling to use  
455 contraception during the study period.
- 456 9) Known intolerance to capecitabine or allergy to its excipients.

457

#### 458 **5.4 Discontinuation Criteria**

- 459 1) Recurrence of breast cancer.
- 460 2) Development for serious advent event develops.
- 461 3) Patients desire to withdraw from the study.
- 462 4) Patients are unable to receive treatment or follow-up

463 according to the study protocol.

464 5) Patients receive other anti-tumor treatment or other treatment  
465 that might affect the study results without the consent of the  
466 investigators.

467 6) Dosage discontinuation for more than 28 days.

468

## 469 **6. STUDY PROTOCOL**

### 470 **6.1 Study Drug:**

471 Capecitabine (Xeloda<sup>®</sup>, Roche, Basel, Switzerland), 500mg per  
472 tablet. The treatment schedule is described in section 4.3.

473

### 474 **6.2 Assessment and Follow-up**

475 The schedule of assessment during treatment and follow-up  
476 are showed in Appendix 1.

477

#### 478 **6.2.1 Baseline Assessment**

479 Baseline assessment should complete within 1 week before  
480 enrollment).

481 ✓ Screening form. Patients who meet all inclusion criteria and  
482 do not meet any exclusion criteria are eligible for this study.  
483 Investigators must complete a screening form at baseline.



- 484 ✓ Medical history and clinical examination. Medical history,  
485 including risk factors for cardiac disease and their medical  
486 history of nervous system diseases must be collected before  
487 enrollment.
- 488 ✓ Complete blood count, hepatic function (including AST, ALT,  
489 T-Bil, D-Bil, TP, and ALB), renal function (including BUN  
490 and Cr), serum electrolytes (including K<sup>+</sup> and Ca<sup>2+</sup>), serum  
491 LDH, AKP, and blood glucose.
- 492 ✓ Electrocardiogram and echocardiogram;
- 493 ✓ Serum CEA and CA153;
- 494 ✓ Imaging studies including chest X-ray, and abdominal  
495 ultrasonography. A bone ECT scan is recommended for  
496 patients with disease of stage ≥ IIb, unexplained bone pain,  
497 or elevated serum ALP
- 498 ✓ 10 mL of peripheral blood will be collected for biomarker  
499 analysis.

500

### 501 **6.2.2 Assessment during Treatment (repeated every 3 months)**

502 Assessment during Treatment are to repeat every 3 monthsS.

- 503 ✓ Physical examination and vital signs;
- 504 ✓ Complete blood count, hepatic function, and renal function;

- 505 ✓ Serum CEA and CA153;
- 506 ✓ Electrocardiogram;
- 507 ✓ Abdominal ultrasonography.

508

### 509 **6.2.3 Assessment during Follow-up**

510 Several randomized studies have shown that regular examination  
511 comprising bone scans, liver US, chest X-rays, and blood tests  
512 could not improve the survival and quality of life (QoL) of patients,  
513 compared with routine physical examination [46, 47]. Therefore,  
514 every 3 months during follow-up, physical examination and  
515 mammography are required for asymptomatic patients in both arms.  
516 However, this is the minimum requirement specified by the protocol,  
517 and investigators are allowed to perform additional evaluations  
518 according to the individual situation of the patients.

519

### 520 **6.2.4 Follow-up**

521 Follow-up of patients in both arms will be initiated after  
522 randomization and will be repeated every 3 months ( $\pm$  28 days)  
523 during the first 2 years after randomization. Patients in the  
524 capecitabine arm are allowed to take medicine at home but must  
525 return to the study site every 3 months ( $\pm$  28 days) for follow-up.

526 Follow-up will be repeated every 6 months ( $\pm$  28 days) during the  
527 3rd to 5th year after randomization, and then annually thereafter.

528 Diagnosis of relapse will be established on clinical manifestation,  
529 radiological findings, and/or histological evidence. If the diagnosis  
530 of relapse is based on clinical symptoms without laboratory or  
531 radiological evidence, other supporting evidence should be  
532 collected as much as possible. After a diagnosis of recurrence is  
533 established, the sites and date of relapse should be recorded.

534 Diagnosis of relapse could also be established if the treatment  
535 strategy is altered based on the hypothesis of relapse, even without  
536 adequate evidence.

537 Chest wall relapse: Defined as soft tissue recurrence in the area  
538 comprising the sternum as the middle line, the clavicle as the upper  
539 margin, the rib as the lower margin, and the posterior axillary line as  
540 lateral margin.

541 Regional relapse: Defined as relapse in the area of the  
542 supraclavicular fossa, subclavicular area, ipsilateral internal  
543 mammary area, and/or ipsilateral axillary lymph nodes. Tissue  
544 biopsy should be performed whenever possible.

545 Distant metastases: Cutaneous or subcutaneous metastasis  
546 should be supported by histological or cytological evidence. Bone

547 metastasis should be supported by imaging studies (e.g., X-ray or  
548 MR). Metastasis in the lung, liver, or brain should be supported by  
549 CT or MRI.

550

## 551 **7. SAFETY ASSESSMENT**

### 552 **7.1 Adverse Events**

#### 553 **7.1.1 Definition of Adverse Events**

554 An AE is defined as any untoward medical occurrence during the  
555 period from randomization to the 28<sup>th</sup> day after the last dose or to  
556 the most recent follow-up, regardless of causal attribution with the  
557 study drug. An AE can be any of the following: A symptom, a sign,  
558 abnormal examination results, or a disease, which may occur at  
559 any time since the initiation of treatment.

560 An AE should be accurately recorded during the study, including  
561 its time, severity, duration, management, and prognosis.

562

#### 563 **7.1.2 Severity of Adverse Events**

564 Severity of AEs is graded according to NCI CTCAE 4.0 (Appendix  
565 2). Grades of AEs that are not listed in Appendix 2 are as follows:

- 566 ● Mild: An effect on the daily function of subjects.
- 567 ● Moderate: A mild effect on the daily function of subjects.

568 ● Severe: A significant effect on the daily function of subjects.

569

### 570 **7.1.3 Association between AEs and Study Treatment**

571 The relationship between AEs and the study drug should be  
572 assessed by investigators according to the following criteria:

573       Definitely related: An AE that follows a reasonable temporal  
574 sequence from administration of the study intervention, follows a  
575 known or expected response pattern to the suspected intervention,  
576 and is confirmed by improvement on stopping and reappearance of  
577 the event on repeated exposure

578       Probably related: An AE that follows a reasonable temporal  
579 sequence from administration of the study intervention, follows a  
580 known or expected response pattern to the suspected intervention,  
581 but that could readily have been produced by the patient's clinical  
582 conditions or other treatments.

583       Probably unrelated: An AE that does not follow a reasonable  
584 temporal sequence from administration of the study intervention,  
585 does not follow a known or expected response pattern to the  
586 suspected intervention, and could readily have been produced by  
587 the patient's clinical conditions or other treatments.

588       Unrelated: An AE that does not follow a reasonable temporal

589 sequence from administration of the study intervention, but follows  
590 a known or expected response pattern to other treatments, and  
591 could readily have been produced by the patient's clinical  
592 conditions or other treatments. The AE can be relieved by  
593 improvement of the clinical conditions or stopping other treatments,  
594 and reappears after repeating other treatments.

595       Unable to determine: An AE that does not follow a reasonable  
596 temporal sequence from administration of the study intervention,  
597 but follows a known or expected response pattern to the study  
598 intervention, and could readily have been produced by other  
599 treatments.

600

## 601 **7.2 Serious Adverse Events (SAEs)**

### 602 **7.2.1 Definition of SAEs**

- 603       ● Results in death.
- 604       ● Is life-threatening.
- 605       ● Requires or prolongs hospitalization.
- 606       ● Causes persistent or significant disability or incapacity.
- 607       ● Results in congenital anomalies or birth defects.

608

### 609 **7.2.2 SAE Reporting**

610 Any SAEs occurring during the study or follow-up should be  
611 reported to the PI and ethics committee by telephone within 24  
612 hours regardless of their causal relationship with the study drug.  
613 The PI is responsible of reporting SAEs to the State Food and Drug  
614 Administration (SFDA) (also to the drug manufacturer within 24  
615 hours if the SAE is considered to be related to the study drug).

616

## 617 **8. STATISTICS**

618 Additional details of the analysis will be provided in the statistical  
619 analysis plan.

### 620 **8.1 Statistical Methods**

621 The primary endpoint is DFS, defined as time from randomization  
622 to the first of breast cancer recurrence or death from any reason.

623 The secondary endpoints include OS, DDFS, LRFS, and safety.

624 Efficacy analyses will be based on the FAS population, defined  
625 as all randomized patients excluding those who withdraw informed  
626 consent before protocol treatment, or who had no follow-up data  
627 after randomization. Safety analyses will be based on the safety  
628 analyses set (SAS) population, defined as all randomized patients  
629 who initiated the protocol treatment and who undergo safety  
630 assessment.

631 For the efficacy analysis, PFS, OS, DDFS, and LRFS will be  
632 analyzed using the Kaplan–Meier method and will be compared  
633 using the log–rank test. The hazard ratio and corresponding 95%  
634 confidence interval will be calculated using stratified Cox  
635 proportional hazard regression.

636 AEs and SAEs will be summarized by arm. The incidence of  
637 grade 3 HFS will be compared between the two arms using Fisher’s  
638 exact test.

639 For continuous variables, the distribution, mean, median,  
640 standard deviation, and interquartile rang (IQR) will be calculated  
641 and compared using a *t*–test or non–parametric test. For  
642 categorical variables, the number and percentage will be presented  
643 in contingency table data and compared using the chi–squared test  
644 or Fisher's exact test.

645 All statistical tests are two–sided with a *P* value of < 0.05 being  
646 considered statistically significant.

647

## 648 **8.2 Sample Size**

649 The assumptions for sample size calculations are as follows:  
650 5–year DFS is 68% in the control arm [10, 13, 28], and 80% in the  
651 experimental arm. The estimated periods of enrollment and



652 follow-up will be 48 and 36 months, respectively. The design is  
653 based on a 2-sided log-rank test with  $\alpha = 0.05$ , power = 90%,  
654 and an interim analysis when the last one patient has completed 12  
655 months of follow-up. The dropout rate is assumed to be 20%.  
656 Approximately 684 patients (342 patients in each arm) will be  
657 enrolled.

658

## 659 **9. ETHICS**

### 660 **9.1 Informed Consent**

661 Before enrollment, study physicians are responsible for a complete  
662 and comprehensive presentation to patients of the study purpose,  
663 the properties of the drug, its possible side effects and potential  
664 risks. Patients should be informed of their rights, the risk, and the  
665 benefit. It should be emphasized that they can withdraw from the  
666 trial at any stage without affecting their subsequent treatment.  
667 Subjects should be promptly informed of any updates of the study,  
668 and a renewed informed consent to continue in the study should be  
669 obtained. Patients should sign the informed consent in duplicate  
670 with their name and date. One copy is given to the patient and the  
671 other is kept in the study archives.

672

673 **9.2 Ethic Policies and Regulations**

674 The investigator will ensure that this study is conducted in full  
675 conformance with the principles of the “Declaration of Helsinki” as  
676 well as “Guideline for Good Clinical Practice (GCP)” and relevant  
677 laws and regulations of the SFDA, whichever affords the greater  
678 protection to the individual.

679 The study will be initiated only after the protocol is approved by  
680 the ethics committee of the Sun Yat–sen University Cancer Center.  
681 Any changes to the protocol during the study should be reported to  
682 the ethics committee and filed.

683

684 **9.3 Protocol Modifications**

685 All protocol modifications must be submitted to the Independent  
686 Ethics Committee (IEC). Approval must be awaited before any  
687 changes can be implemented, except for changes necessary to  
688 eliminate an immediate hazard to the trial patients, or when the  
689 change involve only logistical or administrative aspects of the trial.

690

691 **10. QUALITY ASSURANCE**

692 To ensure accordance with study protocols, physicians are asked to  
693 strictly follow the requirements of GCP throughout the trial, to

694 achieve standard procedures, accurate data, and reliable  
695 conclusions. Specific requirements are as follows:

696 ✓ Obtain informed consent that is signed by each subject or  
697 their agents.

698 ✓ Complete the case report form (CRF) as required.

699 ✓ Follow-up on schedule.

700 ✓ Keep complete records of laboratory examinations, clinical  
701 records, and the original medical documents of the subjects.

702

## 703 **11. DATA PROCESSING AND STORAGE**

### 704 **11.1 Case Report Form (CRF)**

705 The CRF will be completed by investigators in a timely manner to  
706 ensure the accuracy and timeliness of the content. Generally, the  
707 CRF should not be altered. If there are any errors to be corrected,  
708 the original record should be crossed out with a horizontal line, and  
709 the modified text should be signed and dated. The completed CRFs  
710 are reviewed by the quality control officer for data input. No further  
711 modification of CRFs is allowed once the database is locked.

### 712 **11.2 Database Establishment**

713 Statisticians will have questions in the CRFs checked with  
714 investigators, who should reply and return the CRFs promptly.

715 Statisticians should establish the database in a timely manner, and  
716 the data will be locked by investigators, statisticians, and research  
717 assistants after the database has been reviewed. To ensure data  
718 security, a non-permitted person cannot modify the data, and the  
719 data must be backed up.

### 720 **11.3 Data Storage**

721 Investigators should keep the data intact. According to the principle  
722 of GCP in China, research data should be stored for at least five  
723 years.

724

725 **12. REFERENCES**

726

- 727 1. Perou CM, Sorlie T, Eisen MB, et al.: Molecular portraits of human breast  
728 tumours. *Nature* 2000, 406: 747–52.
- 729 2. Sorlie T. Molecular portraits of breast cancer: tumour subtypes as distinct  
730 disease entities. *Eur J Cancer* 2004; 406: 2667–75.
- 731 3. Sorlie T, Perou CM, Tibshirani R, et al.: Gene expression patterns of breast  
732 carcinomas distinguish tumor subclasses with clinical implications. *Proc*  
733 *Natl Acad Sci USA* 2001, 98: 10869–74.
- 734 4. Sotiriou C, Neo SY, McShane LM, et al. Breast cancer classification and  
735 prognosis based on gene expression profiles from a population-based  
736 study. *PNAS*, 2003; 100(18): 10393–8.
- 737 5. Weigelt B, Glas AM, Wessels LF, et al. Gene expression profiles of primary  
738 breast tumors maintained in distant metastases. *Proc Natl Acad Sci USA*.  
739 2003; 100(26): 15901–5.
- 740 6. Abd El-Rehim DM, Pinder SE, Paish CE, et al. Expression of luminal and  
741 basal cytokeratins in human breast carcinoma. *J Pathol.* 2004; 203(2):  
742 661–71.
- 743 7. Jacquemier J, Ginestier C, Rougemont J, et al. Protein expression profiling  
744 identifies subclasses of breast cancer and predicts prognosis. *Cancer Res*.  
745 2005; 65(3): 767–79.
- 746 8. Nielsen TO, Hsu FD, Jensen K, et al. Immunohistochemical and clinical  
747 characterization of the basal-like subtype of invasive breast carcinoma.  
748 *Clin Cancer Res.* 2004; 10: 5367–74.
- 749 9. Sørlie T, Tibshirani R, Parker J, et al. Repeated observation of breast  
750 tumor subtypes in independent gene expression data sets. *PNAS*, 2003;  
751 100(14): 8418–23.
- 752 10. Dent R, Trudeau M, Pritchard KI et al. Triple-negative breast cancer:  
753 clinical features and patterns of recurrence. *Clin. Cancer Res.* 2007; 13;  
754 4429–34.
- 755 11. Tischkowitz M, Brunet JS, Begin LR et al. Use of immunohistochemical  
756 markers can refine prognosis in triple negative breast cancer. *BMC Cancer*  
757 2007; 7; 134.

- 758 12. Bauer KR, Brown M, Cress RD, et al. Descriptive analysis of estrogen  
759 receptor (ER)–negative, progesterone receptor (PR)–negative, and  
760 HER2–negative invasive breast cancer, the so–called triple–negative  
761 phenotype: a population–based study from the California cancer Registry.  
762 *Cancer* 2007; 109; 1721–8.
- 763 13. Haffty BG, Yang Q, Reiss M, et al. Locoregional Relapse and Distant  
764 Metastasis in Conservatively Managed Triple Negative Early-Stage Breast  
765 Cancer. *J Clin Oncol* 2006;24(36):5652-7.
- 766 14. Carey LA, Dees EC, Sawyer L, et al: The triple negative paradox: Primary  
767 tumor chemosensitivity of breast cancer subtypes. *Clin Cancer Res*, 2007;  
768 13:2329–34.
- 769 15. Abd El–Rehim DM, Ball G, Pinder SE, et al. High–throughput protein  
770 expression analysis using tissue microarray technology of a large  
771 well–characterised series identifies biologically distinct classes of breast  
772 cancer confirming recent cDNA expression analyses. *Int J Cancer* 2005;  
773 116: 340–50.
- 774 16. van de Rijn M, Perou CM, Tibshirani R, et al. Expression of cytokeratins 17  
775 and 5 identifies a group of breast carcinomas with poor clinical outcome.  
776 *Am J Pathol* 2002; 161:1991–96.
- 777 17. Banerjee S, Reis–Filho JS, Ashley S, et al. Basal–like breast carcinomas:  
778 clinical outcome and response to chemotherapy. *J Clin Pathol* 2006; 59:  
779 729–35.
- 780 18. Rodriguez–Pinilla SM, Sarrio D, Honrado E, et al. Prognostic significance  
781 of basal–like phenotype and fascin expression in node negative invasive  
782 breast carcinomas. *Clin Cancer Res* 2006; 12: 1533–39.
- 783 19. Tsuda H, Takarabe T, Hasegawa F, et al. Large, central cellular zones  
784 indicating myoepithelial tumor differentiation in high–grade invasive ductal  
785 carcinomas as markers of predisposition to lung and brain metastases. *Am*  
786 *J Surg Pathol* 2000; 24: 197–202.
- 787 20. Korsching E, Packeisen J, Agelopoulos K, et al. Cytogenetic alterations  
788 and cytokeratin expression patterns in breast cancer: integrating a new  
789 model of breast differentiation into cytogenetic pathways of breast  
790 carcinogenesis. *Lab Invest* 2002; 82: 1525–33.

- 791 21. Fulford LG, Easton DF, Reis-Filho JS, et al. Specific morphological  
792 features predictive for the basal phenotype in grade 3 invasive ductal  
793 carcinoma of breast. *Histopathology* 2006; 49; 22–34.
- 794 22. Livasy CA, Karaca G, Nanda R et al. Phenotypic evaluation of the  
795 basal-like subtype of invasive breast carcinoma. *Mod. Pathol.* 2006; 19;  
796 264–71.
- 797 23. Jacquemier J, Padovani L, Rabayrol L et al. Typical medullary breast  
798 carcinomas have a basal/myoepithelial phenotype. *J. Pathol.* 2005; 207;  
799 260–8.
- 800 24. Rakha EA, El-Sayed ME, Green AR et al. Prognostic markers in  
801 triple-negative breast cancer. *Cancer* 2007; 109; 25–32.
- 802 25. Early Breast Cancer Trialists' Collaborative Group (EBCTCG). Effects of  
803 chemotherapy and hormonal therapy for early breast cancer on recurrence  
804 and 15-year survival: an overview of the randomised trials. *Lancet.* 2005;  
805 365(9472): 1687–717.
- 806 26. Dahabreh IJ, Linardou H, Siannis F, Fountzilas G, Murray S. Trastuzumab  
807 in the adjuvant treatment of early-stage breast cancer: a systematic  
808 review and meta-analysis of randomized controlled trials. *Oncologist.*  
809 2008;13(6):620–30.
- 810 27. Cole BF, Gelber RD, Gelber S, Coates AS, Goldhirsch A.  
811 Polychemotherapy for early breast cancer: an overview of the randomised  
812 clinical trials with quality-adjusted survival analysis. *Lancet* 2001;  
813 358(9278): 277-86.
- 814 28. Liedtke C, Mazouni C, Hess KR, et al. Response to neoadjuvant therapy  
815 and long-term survival in patients with triple-negative breast cancer. *J Clin*  
816 *Oncol.* 2008; 26(8): 1275–81.
- 817 29. Rouzier R, Perou CM, Symmans WF, et al. Breast Cancer Molecular  
818 Subtypes Respond Differently to Preoperative Chemotherapy. *Clin Cancer*  
819 *Res,* 2005; 11(16): 5678–5685.
- 820 30. Browder T, Butterfield CE, Kräling BM, et al. Antiangiogenic scheduling of  
821 chemotherapy improves efficacy against experimental drug-resistant  
822 cancer. *Cancer Res* 2000; 60: 1878–86.
- 823 31. Klement G, Baruchel S, Rak J, et al. Continuous low-dose therapy with

- 824 vinblastine and vegf receptor-2 antibody induces sustained tumor  
825 regression without overt toxicity. *J Clin Invest* 2000; 105: R15-24
- 826 32. Ghiringhelli F, Menard C, Puig PE, et al. Metronomic cyclophosphamide  
827 regimen selectively depletes CD4+ CD25+ regulatory T cells and restores  
828 T and NK effector functions in end stage cancer patient. *Cancer Immunol*  
829 *Immunother* 2006; 56: 641-8.
- 830 33. Colleoni M, Rocca A, Sandri MT, et al. Low-dose oral methotrexate and  
831 cyclophosphamide in metastatic breast cancer: antitumor activity and  
832 correlation with vascular endothelial growth factor levels. *Ann Oncol* 2002;  
833 13: 73-80.
- 834 34. Colleoni M, Orlando L, Sanna G, et al. Metronomic low-dose oral  
835 cyclophosphamide and methotrexate plus or minus thalidomide in  
836 metastatic breast cancer: antitumor activity and biological effects. *Ann*  
837 *Oncol* 2006; 17: 232-8.
- 838 35. Orlando L, Cardillo A, Rocca A, et al. Prolonged clinical benefit with  
839 metronomic chemotherapy in patients with metastatic breast cancer.  
840 *Anticancer Drugs* 2006; 17: 961-7.
- 841 36. Emmenegger U, Man S, Shaked Y, et al. A comparative analysis of  
842 low-dose metronomic cyclophosphamide reveals absent or low-grade  
843 toxicity on tissues highly sensitive to the toxic effects of maximum tolerated  
844 dose regimens. *Cancer Res* 2004; 64: 3994-4000.
- 845 37. Blum JL, Dieras V, Lo Russo PM et al. Multicenter, phase II study of  
846 capecitabine in taxane-pretreated metastatic breast carcinoma patients.  
847 *Cancer* 2001; 92: 1759-68.
- 848 38. Reichardt P, Von Minckwitz G, Thuss-Patience PC et al. Multicenter phase  
849 II study of oral capecitabine (Xeloda) in patients with metastatic breast  
850 cancer relapsing after treatment with a taxane-containing therapy. *Ann*  
851 *Oncol* 2003; 14: 1227-33.
- 852 39. O'Shaughnessy J, Miles D, Vukelja S et al. Superior survival with  
853 capecitabine plus docetaxel combination therapy in  
854 anthracyclinepretreated patients with advanced breast cancer: Phase III  
855 trial results. *J Clin Oncol* 2002; 20: 2812-23.
- 856 40. Leonard R, O'Shaughnessy J, Vukelja S, et al. Detailed analysis of a



857 randomized Phase III trial: can the tolerability of capecitabine plus  
858 docetaxel be improved without compromising its survival advantage? *Ann*  
859 *Oncol.* 2006; 17(9): 1379–85.

860 41. Blum JL, Jones SE, Buzdar AU, et al. Multicenter phase II study of  
861 capecitabine in paclitaxel– refractory metastatic breast cancer. *J Clin*  
862 *Oncol.* 1999; 17(2): 485–93

863 42. Martin M, Calvo L, Martinez N, et al. Standard Versus Continuous  
864 Administration of Capecitabine in Metastatic Breast Cancer  
865 (GEICAM/2009-05): A Randomized, Noninferiority Phase II Trial With a  
866 Pharmacogenetic Analysis. *Oncologist* 2015; 20(2): 111-2.

867 43. Stockler MR, Harvey VJ, Francis PA, et al. Capecitabine versus classical  
868 cyclophosphamide, methotrexate, and fluorouracil as first-line  
869 chemotherapy for advanced breast cancer. *J Clin Oncol* 2011; 29:  
870 4498-504.

871 44. Blum JL, Jones SE, Buzdar AU. Blum J, Jones S, Buzdar A. Capecitabine  
872 (Xeloda) in 162 patients with paclitaxel-pretreated mbc: updated results  
873 and analysis of dose modification. *Eur J Cancer* 2001; 37(6): S190-S.

874 45. Rosselli Del Turco M, Palli D, Cariddi A, et al. Intensive diagnostic  
875 follow-up aftertreatment of primary breast cancer. A randomized trial.  
876 National Research Council Project on Breast Cancer follow-up. *JAMA*  
877 1994; 271:1593–7

878 46. Rosselli Del Turco M, Palli D, Cariddi A, Ciatto S, Pacini P, Distante V.  
879 Intensive diagnostic follow-up after treatment of primary breast cancer. A  
880 randomized trial. National Research Council Project on Breast Cancer  
881 follow-up. *Jama* 1994; 271(20): 1593-7.

882 47. Impact of follow-up testing on survival and health-related quality of life in  
883 breast cancer patients. A multicenter randomized controlled trial. The  
884 GIVIO Investigator. *JAMA* 1994; 271(20):1587–92.

885  
886

887 **13. APPENDIX 1**

888

889

890

**Schedule of the Study**

|                                               | Baseline<br>(Within 7<br>days before<br>enrollment) | Treatment | End of<br>treatment | Follow-up<br>(d)              |                               |
|-----------------------------------------------|-----------------------------------------------------|-----------|---------------------|-------------------------------|-------------------------------|
| Informed consent                              | √                                                   |           |                     |                               |                               |
| Screening form                                | √                                                   |           |                     |                               |                               |
| Blood samples                                 | √                                                   | √         | √                   | as<br>clinically<br>indicated |                               |
| <b>Medical records and examinations</b>       |                                                     |           |                     |                               |                               |
| Observation<br>items                          | Medical history(a)                                  | √         |                     |                               |                               |
|                                               | Physical<br>examination                             | √         | √                   | √                             |                               |
|                                               | Vital signs                                         | √         | √                   | √                             |                               |
|                                               | ECOG score                                          | √         | √                   | √                             |                               |
|                                               | Complete blood<br>count                             | √         | √                   | √                             | as<br>clinically<br>indicated |
|                                               | Blood chemistry<br>test(b)                          | √         | √                   | √                             | as<br>clinically<br>indicated |
|                                               | Coagulation function<br>(4 items)                   | √         | √                   | √                             | as<br>clinically<br>indicated |
|                                               | CEA/CA153                                           | √         | √                   | √                             | as<br>clinically<br>indicated |
|                                               | Electrocardiogram                                   | √         | √                   | √                             | as<br>clinically<br>indicated |
|                                               | Echocardiogram                                      | √         |                     | √                             | as<br>clinically<br>indicated |
|                                               | Imaging<br>examination(c)                           | √         |                     | √                             | as<br>clinically<br>indicated |
|                                               | Adverse events                                      |           | √                   | √                             | √                             |
|                                               | Concomitant<br>medication                           |           | √                   | √                             | √                             |
| Assessment of<br>recurrence and<br>metastasis |                                                     | √         | √                   | √                             |                               |

891

892 **NOTES:**

893 a) Medical history: Risk factors of heart disease and history of nervous system

894 disease should be recorded;

- 895 b) Blood chemistry tests: Hepatic function (AST, ALT, T-Bil, D-Bil, TP, and  
896 ALB), renal function (BUN and Cr), serum electrolytes (K<sup>+</sup> and Ca<sup>2+</sup>),  
897 serum LDH and AKP, and serum glucose.
- 898 c) Imaging examination: Including chest X-ray and abdominal ultrasonography.  
899 Bone ECT scan is recommended for patients with disease of stage ≥ IIB,  
900 unexplained bone pain, or elevated serum ALP; Mammography is repeated  
901 annually;
- 902 d) Follow-up is repeated every 3 months (± 28 days) during the first 2 years  
903 after randomization, every 6 months (± 28 days) during the 3rd to 5th year  
904 after randomization, and then annually thereafter.
- 905
- 906

907 **APPENDIX 2 Common Terminology Criteria for Adverse**  
908 **Events v4.0**

909 ✓ The CTCAE v4.0 manual can be found at the following URL:

910 <http://ctep.cancer.gov/forms/CTCAEv4.pdf>.

911

912

913  
914  
915  
916  
917  
918  
919  
920  
921  
922  
923  
924  
925  
926  
927  
928  
929  
930  
931  
932  
933  
934

**A multicenter, phase III randomized study  
of metronomic capecitabine maintenance  
after standard treatment in patients with  
operable triple–negative breast cancer**

(Protocol code: SYSUCC–EBC–CHEMO–001)

(Coding description: Sun Yat–sen University Cancer Center–Early  
Breast Cancer–Chemotherapy–001)

Version: 3.0

Principle Investigators

Zhong Yu YUAN, M.D. and Xi WANG, M.D.

Sun Yat–sen University Cancer Center

Date of approved version: January 19, 2017

|     |                                                    |    |
|-----|----------------------------------------------------|----|
| 935 | <b>Table of Contents</b>                           |    |
| 936 |                                                    |    |
| 937 | 1. Synopsis of the study.....                      | 48 |
| 938 | 1.1 Objectives.....                                | 48 |
| 939 | 1.2 Study Design.....                              | 48 |
| 940 | 1.3 Main Inclusion/Exclusion Criteria.....         | 48 |
| 941 | 1.4 Investigational Drug and Administration.....   | 50 |
| 942 | 1.5 Study Endpoints.....                           | 51 |
| 943 | 2. Background.....                                 | 51 |
| 944 | 3. Objectives.....                                 | 55 |
| 945 | 3.1 Primary Endpoint.....                          | 55 |
| 946 | 3.2 Secondary Endpoints.....                       | 56 |
| 947 | 4. Study design.....                               | 57 |
| 948 | 4.1 Summary of Design.....                         | 57 |
| 949 | 4.2 Randomization.....                             | 59 |
| 950 | 4.3 Capecitabine Administration.....               | 60 |
| 951 | 4.3.1 Initiating Dose.....                         | 60 |
| 952 | 4.4.2 Dose Adjustment.....                         | 61 |
| 953 | 4.3.3 Concomitant and Prophylactic Medication..... | 63 |
| 954 | 5. Selection of Subjects.....                      | 64 |
| 955 | 5.1 Enrollment.....                                | 64 |
| 956 | 5.2 Inclusion Criteria.....                        | 64 |
| 957 | 5.3 Exclusion Criteria.....                        | 66 |
| 958 | 5.4 Discontinuation Criteria.....                  | 66 |
| 959 | 6. Study Protocol.....                             | 67 |
| 960 | 6.1 Study Drug.....                                | 67 |
| 961 | 6.2 Assessment and Follow-up.....                  | 67 |
| 962 | 6.2.1 Baseline assessment.....                     | 67 |
| 963 | 6.2.2 Assessment during Treatment.....             | 68 |

|     |                                            |    |
|-----|--------------------------------------------|----|
| 964 | 6.2.3 Assessment during Follow-up.....     | 69 |
| 965 | 6.2.4 Follow-up.....                       | 69 |
| 966 | 7. Safety Assessment.....                  | 71 |
| 967 | 7.1. Adverse Events.....                   | 71 |
| 968 | 7.1.1 Definition of Adverse Events.....    | 71 |
| 969 | 7.1.2 Severity of Adverse Events.....      | 71 |
| 970 | 7.1.3 Association between Adverse Events   |    |
| 971 | and Study Treatment.....                   | 72 |
| 972 | 7.2. Serious Adverse Events (SAEs) .....   | 73 |
| 973 | 7.2.1 Definition of SAEs.....              | 73 |
| 974 | 7.2.2 SAEs Reporting.....                  | 74 |
| 975 | 8. Statistics.....                         | 74 |
| 976 | 8.1 Statistical Methods.....               | 74 |
| 977 | 8.2 Sample Size.....                       | 75 |
| 978 | 9. Ethics.....                             | 76 |
| 979 | 9.1 Informed Consent.....                  | 76 |
| 980 | 9.2 Ethic Policies and Regulations.....    | 77 |
| 981 | 9.3 Protocol Modifications.....            | 77 |
| 982 | 10. Quality Assurance.....                 | 77 |
| 983 | 11. Data Processing and Storage.....       | 78 |
| 984 | 11.1 Case Report Form (CRF) .....          | 78 |
| 985 | 11.2 Database Establishment.....           | 78 |
| 986 | 11.3 Data Storage.....                     | 79 |
| 987 | 12. References.....                        | 80 |
| 988 | 13. Appendix 1 Schedule of Study.....      | 87 |
| 989 | 14. Appendix 2 Common Terminology Criteria |    |
| 990 | for Adverse Events v4.0.....               | 89 |
| 991 |                                            |    |

992 **1. SYNOPSIS OF THE STUDY**

993 **1.1 Objectives**

994 This study is designed to compare the efficacy (disease-free  
995 survival, DFS) and safety of metronomic capecitabine maintenance  
996 for one year with observation after standard local and systemic  
997 treatment in patients with operable triple negative breast cancer  
998 (TNBC).

999

1000 **1.2 Study design**

1001 This study is to be a multi-center, phase III, randomized controlled  
1002 trial. The study will include the following two treatment arms: 424  
1003 subjects will be randomized in a 1:1 fashion (212 in each arm) to  
1004 receive treatment with either: Metronomic capecitabine  
1005 maintenance (experimental arm); or observation (control arm) until  
1006 objective disease recurrence, protocol violation, intolerable toxicity,  
1007 death, or withdrawal of consent. Subjects will be stratified by lymph  
1008 node status (positive or negative). Subjects discontinuing from the  
1009 active treatment phase will enter the follow-up phase during which  
1010 survival information will be collected.

1011

1012 **1.3 Main Inclusion/Exclusion Criteria**



1013 Main Inclusion Criteria:

- 1014 1) Female, aged  $\geq 18$  years old and  $\leq 70$  years.
- 1015 2) Histologically confirmed invasive ductal carcinoma, no  
1016 specific type (NOS).
- 1017 3) Stage Ib–IIIc disease (N3 disease with involvement of the  
1018 supraclavicular or internal mammary lymph nodes will be  
1019 excluded).
- 1020 4) estrogen receptor (ER)–/progesterone receptor  
1021 (PR)–negative and human epidermal growth factor receptor 2  
1022 (HER2) negative (ER– and PR–negative is defined by lower  
1023 than 1% immunohistochemistry staining; HER2–negative is  
1024 defined by IHC score 0,1 or 2 with HER2–fluorescence in situ  
1025 hybridization negative).
- 1026 5) Have completed adequate surgery, neo-/adjuvant  
1027 chemotherapy and radiation therapy (if indicated).
- 1028 6) Available results for contralateral mammography, chest X–ray,  
1029 abdominal ultrasonography,  $^{99m}\text{Tc}$ –bone scanning (required  
1030 for patients with stage Ib–IIIc disease) within 3 months before  
1031 randomization.
- 1032 7) Adequate organ function including bone marrow, renal  
1033 function, hepatic function.

1034 8) Compliance with the study protocol.

1035 9) Have provided written and signed informed consent.

1036 Main Exclusion Criteria:

1037 1) Inflammatory or bilateral breast cancer.

1038 2) Previously diagnosed with other malignancies (not including  
1039 cured cervical carcinoma *in situ*, cutaneous squamous cell  
1040 carcinoma, and cutaneous basal cell carcinoma).

1041 3) History of invasive breast cancer.

1042 4) Patients who are receiving or will receive other biological  
1043 agents or immunotherapy.

1044 5) Severe dysfunction of the heart, lung, liver, or kidney.

1045 6) Patients with malabsorption syndrome diseases impairing GI  
1046 function, resection of stomach or small intestine, or who are  
1047 unable to swallow capecitabine tablets.

1048 7) Patients who are pregnant or who are unwilling to use  
1049 contraception during the study period.

1050 8) Known intolerance to capecitabine or allergy to its excipients.

1051

1052 **1.4 Investigational Drug and Administration**

1053 Capecitabine group (experimental arm): Capecitabine will be  
1054 administered at a dose of 650 mg/m<sup>2</sup> orally twice daily (total daily

1055 dose = 1300 mg/m<sup>2</sup>) continuously for one year, starting within 2  
1056 weeks from randomization.

1057

## 1058 **1.5 Study Endpoints**

1059 The primary efficacy parameter, DFS, will be analyzed in the full  
1060 analysis set (FAS) population.

1061 The secondary efficacy parameters, including overall survival (OS),  
1062 disease-free survival (DDFS), and locoregional recurrence-free  
1063 survival (LRFS), will be analyzed in FAS population.

1064 Safety and tolerability will be assessed using reporting of adverse  
1065 events (AEs), graded according to NCI-CTC (version 4.0).

1066

## 1067 **2. BACKGROUND**

1068 Breast cancer comprises a group of diseases that show genetic  
1069 heterogeneity and biological diversity [1, 2], which could be  
1070 classified into five subtypes distinguished by their gene expression  
1071 profiles [3, 4], including luminal A, luminal B, HER2+, normal breast,  
1072 and basal-like [5]. The genotype of breast cancer is established  
1073 using complicated gene analysis, which unsuitable for formalin-  
1074 fixed specimens. Immunohistochemistry-based classification  
1075 (using ER, PR, HER2, and KI-67) is more widely used in clinical

1076 practice [6–8], revealing a group of breast cancers characterized by  
1077 negative expression of ER, PR, and HER2, termed as  
1078 “triple–negative” breast cancer (TNBC) [9]. Basal–like breast  
1079 cancer and TNBC are differently defined, and might overlap with  
1080 each other. The majority of basal–like breast cancers are  
1081 triple–negative. Therefore, TNBC is used as an alternative  
1082 histopathological definition of basal–like breast cancer in clinical  
1083 practice, as well as in the inclusion criteria of most clinical trials.

1084 TNBC comprises approximately 15%–25% of breast cancer in  
1085 women [10–14], and is considered an independent  
1086 clinicopathological subtype, with special clinical, pathological, and  
1087 molecular genetic characteristics. In terms of clinical characteristics,  
1088 TNBC is more common among young patients, with a high risk of  
1089 early (within 2 years after surgery) recurrence, distant metastasis,  
1090 and death [15–19]. TNBC has a shorter median survival after first  
1091 recurrence than other types of breast cancer, with most deaths  
1092 occurring within the first 5 years [10]. Visceral metastasis  
1093 (especially in the lung and brain) is more frequent than bone  
1094 metastasis, which might be one of the major contributors to the  
1095 poor prognosis of TNBC. Pathologically, TNBC is associated with  
1096 the presence of high histological grade, invasive ductal carcinoma,

1097 a high proliferation index, and high expression of p53 and EGFR  
1098 [20-24]. Molecularly, gene expression profiles of TNBC have  
1099 revealed its high molecular homology [1, 4, 9].

1100 For hormone receptor positive breast cancer, anti-estrogen  
1101 therapies have significantly reduced recurrence and death [25]. For  
1102 HER2+ breast cancers, anti-HER2 therapies (e.g., trastuzumab)  
1103 have also significantly reduced recurrence [26]. Currently, there are  
1104 few targeted therapies for TNBC, and chemotherapy is the only  
1105 effective strategy to reduce recurrence, which is another reason for  
1106 the poor prognosis of TNBC. Endocrine therapy for HR+ breast  
1107 cancer and anti-HER2 therapy for HER2+ breast cancer are all  
1108 long-term maintenance therapies after standard treatment [27].  
1109 Therefore, we propose that a long-term effective maintenance  
1110 treatment might significantly improve the outcome in patients with  
1111 early TNBC.

1112 Most TNBC is more chemosensitive than HR+ breast cancer.  
1113 Traditional regimens tend to achieve a better response in patients  
1114 with TNBC; however, the duration of the response usually does not  
1115 last long. TNBC is still characterized with dismal DFS, PFS, and OS  
1116 [14, 28, 29]. Therefore, the aggressive biological behavior and the  
1117 lack of effective risk-reducing treatment have both contributed to

1118 the poor prognosis of TNBC.

1119 Metronomic chemotherapy is a relatively novel regimen using  
1120 continuous and low-dose chemotherapeutic agents with short or no  
1121 intervals. Browder and Klement, et al. reported the anti-tumor  
1122 activity of metronomic chemotherapy for the first time. The novel  
1123 pattern of dosage has a different mechanism compared with  
1124 conventional dosage regimens by exerting anti-angiogenesis  
1125 effects [30, 31]. In addition, metronomic chemotherapy also  
1126 produces antitumor effects by upregulating anti-tumor immune  
1127 response in the host [32]. Metronomic chemotherapy had achieved  
1128 good efficacy with low toxicity in advanced breast cancer [33–36].  
1129 Considering that angiogenesis and immune surveillance escape  
1130 are major mechanisms of tumor metastasis, metronomic  
1131 chemotherapy might be a potential therapeutic option for operable  
1132 TNBC with high risk of distant metastasis.

1133 Capecitabine is an effective agent with good tolerability and is  
1134 convenient for breast cancer [37–41], which makes it an optimal  
1135 choice for long-term metronomic use. The most common adverse  
1136 events of capecitabine include hand-foot syndrome (HFS),  
1137 diarrhea, and stomatitis, which are non-life threatening and can be  
1138 managed using education without impairing efficacy [40]. Two recent

1139 phase III trials (FinXX and USO), which enrolled all subtypes of  
1140 breast cancer, have shown by subgroup analysis that the addition  
1141 of capecitabine to standard treatment significantly reduced the risk  
1142 of relapse for TNBC, especially the risk of distant metastases.

1143 In summary, high rate of distant metastases and lack of effective  
1144 treatment are the major reasons for the poor prognosis of TNBC.  
1145 As a novel model of treatment, metronomic chemotherapy might be  
1146 effective for TNBC by targeting angiogenesis and immune escape.  
1147 The good efficacy and tolerability of capecitabine make it an  
1148 optimal drug for metronomic chemotherapy. Clinical studies have  
1149 also demonstrated a reduced risk of relapse in patients with TNBC  
1150 receiving capecitabine in addition to standard treatment. This study  
1151 aims to evaluate the efficacy and safety of capecitabine  
1152 metronomic chemotherapy after standard treatment in patients with  
1153 early TNBC.

1154

### 1155 **3. OBJECTIVES**

#### 1156 **3.1 Primary Endpoint**

1157 To compare the DFS in patients who are randomized at enrollment  
1158 to treatment with metronomic capecitabine maintenance  
1159 (experimental arm) with in observation arm (control arm).

1160 DFS is defined as time from randomization to the first of any of  
1161 the following events:

1162 5) Relapse of invasive breast cancer in the ipsilateral chest wall  
1163 and regional lymph nodes

1164 6) Distant metastases (histologically confirmed or clinically  
1165 diagnosed)

1166 7) Breast cancer related, non–breast cancer related or unknown  
1167 deaths

1168 8) Contralateral invasive breast cancer

1169

### 1170 **3.2 Secondary Endpoints**

1171 To compare the overall survival (OS), distant disease–free survival  
1172 (DDFS), locoregional recurrence–free survival (LRFS) and safety  
1173 between the experimental arm and observation arm. In addition,  
1174 exploratory analysis will include biomarkers that predict the efficacy  
1175 and toxicity of capecitabine.

1176 OS is defined as time from randomization to death caused by any  
1177 reason.

1178 DDFS is defined as time from randomization to the first  
1179 occurrence of any of the following events: Distant metastases,  
1180 death caused by any reason, and contralateral invasive breast



1181 cancer (NEJM 2005; 353:2747).

1182 LRFS is defined as time from randomization to locoregional  
1183 invasive recurrence or death.

1184 Safety: The frequency and severity degree of AEs were judged  
1185 based on NCI CTC V4.0.

1186

## 1187 **4. STUDY DESIGN**

### 1188 **4.1 Summary of Design**

1189 This is a multi-center, phase III, randomized controlled study of  
1190 metronomic capecitabine maintenance versus observation.

1191 Approximately 424 subjects with TNBC will be randomized in a  
1192 1:1 fashion (212 in each arm) to receive treatment with either:  
1193 Metronomic capecitabine maintenance (experimental arm); or  
1194 observation (control arm) until objective disease recurrence,  
1195 protocol violation, intolerable toxicity, death, or withdrawal of  
1196 consent. Subjects will be stratified by lymph node status (positive or  
1197 negative).

1198 Subjects will participate in the study within 4 weeks after  
1199 completion of standard curative treatment including surgery,  
1200 neo-/adjuvant chemotherapy and radiotherapy. Patients in the two  
1201 arms will be followed-up every 3 months using physical, laboratory,

1202 and radiological examinations according to the study protocol. This  
 1203 study will be completed in approximately 108 months including 72  
 1204 months for accrual and approximately 36 months of follow-up  
 1205 survival for the last subject enrolled. An overview of the study  
 1206 design is depicted below:

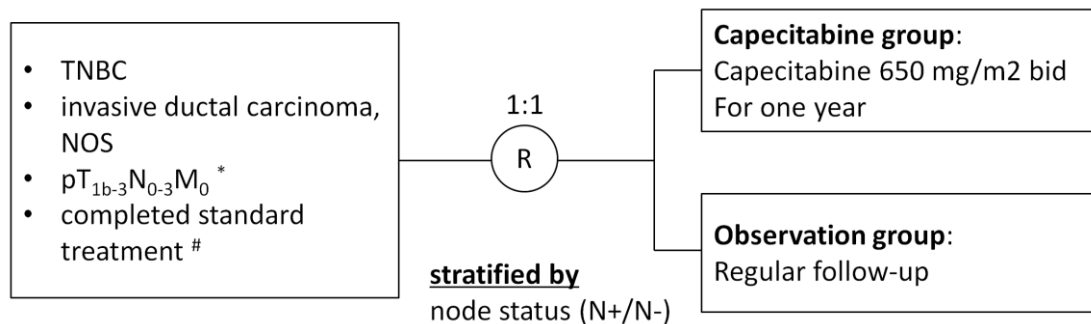

\*N3: Not including internal mammary or supraclavicular nodes involvement  
 # standard treatment including surgery, (neo)adjuvant chemotherapy and radiation therapy (if indicated)

1207  
 1208

1209 **Recommended chemotherapy regimens:** According to the  
 1210 NCCN guidelines version 2010, recommended chemotherapy  
 1211 regimens and dosages are listed in Table 1. Dosage adjustment  
 1212 according to a patient's toleration will be allowed with no more than  
 1213 25% reduction of the standard dose. A minimum of four cycles of  
 1214 neo-/adjuvant chemotherapy should be delivered. For  
 1215 node-positive patients, chemotherapy regimens containing  
 1216 anthracyclines and taxanes are recommended.

1217 Recommended indications for post-operative radiotherapy

1218 include: Involvement of  $\geq$  four axillary nodes, primary tumor  $\geq$  5 cm  
 1219 in size, post breast conserving surgery, positive surgical margins,  
 1220 involvement of internal mammary nodes (in selected cases), and  
 1221 involvement of 1–3 axillary nodes (in selected cases).

1222 **Table 1** Recommended chemotherapy regimen and dosage

|       | Regimens(drugs)                                                        | Dose(mg/m <sup>2</sup> )      |
|-------|------------------------------------------------------------------------|-------------------------------|
| CMF   | cyclophosphamide/methotrexate/fluorouracil                             | 500/ 40/ 600                  |
| AC    | doxorubicin/cyclophosphamide                                           | 60/ 600                       |
| EC    | epirubicin/cyclophosphamide                                            | 75–90/ 600                    |
| FAC   | 5–fluorouracil/doxorubicin/cyclophosphamide                            | 500/ 50/ 500                  |
| FEC   | 5–fluorouracil/epirubicin/cyclophosphamide                             | 500/ 75–90/ 500               |
| TAC   | docetaxel/doxorubicin/cyclophosphamide                                 | 75/ 50/ 500                   |
| TEC   | docetaxel/epirubicin/cyclophosphamide                                  | 75/ 75/ 500                   |
| AC–P  | doxorubicin/cyclophosphamide→weekly or<br>every–3–week paclitaxel      | 60/ 600→80 (qw),<br>175 (q3w) |
| EC–P  | epirubicin/cyclophosphamide→weekly or<br>every–3–week paclitaxel       | 90/ 600→80 (qw),<br>175 (q3w) |
| AC–wP | doxorubicin/cyclophosphamide→paclitaxel<br>(Dose–dense)                | 60/ 600→175 (q2w)             |
| FEC–T | 5–fluorouracil/epirubicin/cyclophosphamide→docetaxel,<br>every 3 weeks | 500/ 75–90/ 500→75            |
| TC    | docetaxel/cyclophosphamide                                             | 75/ 600                       |

1223  
 1224

1225 **4.2 Randomization**

1226 On verification of inclusion and exclusion criteria, eligible patients  
 1227 will be randomized using the method of stratified permuted blocks  
 1228 to receive metronomic capecitabine maintenance or observation in  
 1229 a 1:1 ratio. Patients will be stratified according to lymph node status

1230 (negative vs. positive). A computerized number generator in the  
1231 SAS Software (version 8.01) will generate a randomization table,  
1232 the results of which were placed in sequentially numbered opaque  
1233 envelopes and remained concealed until after enrollment.

1234 Central randomization will be performed. When a suitable patient  
1235 is to be enrolled into the study, the Investigator site will contact  
1236 principal investigator (PI) site, and will be informed over the  
1237 telephone system at the time of individual patient enrollment what  
1238 the treatment allocation is, and to which treatment arm the patient  
1239 has been randomized. This is a multicenter study to be conducted  
1240 at approximately 15 study sites.

1241

## 1242 **4.3 Capecitabine Administration**

### 1243 **4.3.1 Initiating Dose**

1244 The approved dose of capecitabine was 1250 mg/m<sup>2</sup> bid, days  
1245 1–14 every 21 days. However, the dose of capecitabine for  
1246 metronomic chemotherapy is uncertain, particularly in the adjuvant  
1247 setting. Some small sample studies suggested that capecitabine at  
1248 650 mg/m<sup>2</sup> bid, continuously for one year in metastatic breast  
1249 cancer had lower toxicity and was well tolerated [42–44]. The  
1250 initiate dose of capecitabine was 650 mg/m<sup>2</sup> bid, continuously for

1251 one year.

1252 Body surface area is calculated from height and body weight.  
1253 Given that the height and weight of Chinese woman are 150–180  
1254 cm and 40–80 kg, respectively, their body surface area lie between  
1255 1.30 m<sup>2</sup> and 2.0 m<sup>2</sup>. Combining the availability of capecitabine in  
1256 China with the convenience of patients, the daily actual dose will be  
1257 decided upon by using the **Table 2**.

1258 **Table 2 The daily dose of capecitabine**

| Body surface area (m <sup>2</sup> ) | Total Daily Dose (mg) | Morning dose (mg) | Evening dose (mg) |
|-------------------------------------|-----------------------|-------------------|-------------------|
| 1.30–1.32                           | 1690–1716             | 1000              | 500               |
| 1.33–1.71                           | 1729–2223             | 1000              | 1000              |
| 1.72–2.0                            | 2236–2600             | 1500              | 1000              |

1259

#### 1260 **4.3.2 Dose Adjustment**

1261 The most common AEs of capecitabine is HFS, and grading of HFS  
1262 is listed in **Table 3**. Studies suggested that almost all AEs could  
1263 improve after dose modification [45]. Dose adjustment of  
1264 capecitabine in patients who experience HFS is listed in **Table 4**.  
1265 Note, because of lower dose in patients with body surface areas  
1266 1.3–1.32 m<sup>2</sup>, only one dose reduction of capecitabine is allowed,  
1267 from 1500 mg to 1000mg (morning 500mg, evening 500mg). In  
1268 addition, once a dose has been reduced for a subject, all

1269 subsequent doses should be administered at that dose, unless  
 1270 further dose reduction is required. Dose reescalation is not  
 1271 permitted. If dosage delay occurs because of AEs, whether to  
 1272 continue treatment should be determined by the investigator by  
 1273 balancing the benefit and risk on an individual basis. Regardless of  
 1274 the cause of the delay, patients who discontinue dosage for more  
 1275 than 4 weeks should terminate treatment and withdraw from the  
 1276 trial.

1277 **Table 3 Grading of HFS Caused by Capecitabine**

| Grade | Manifestation                                                                                                                             |
|-------|-------------------------------------------------------------------------------------------------------------------------------------------|
| 1     | Numbness, tingling sensation, erythema of hands and/or feet that cause painless swelling or discomfort without affecting daily activities |
| 2     | Painful erythema or swelling of hands and/or feet that affect daily activities                                                            |
| 3     | Wet desquamation, ulceration, blistering, severe pain of hands and/or feet, and/or unable to work or perform daily activities             |

1278

1279 **Table 4 Dose Adjustment of Capecitabine**

| Grade | Dose modification of capecitabine                                                                                                                                                                                                                                                                                                                                                                                                                                                                                            |
|-------|------------------------------------------------------------------------------------------------------------------------------------------------------------------------------------------------------------------------------------------------------------------------------------------------------------------------------------------------------------------------------------------------------------------------------------------------------------------------------------------------------------------------------|
| 1     | Dose modifications are not recommended                                                                                                                                                                                                                                                                                                                                                                                                                                                                                       |
| 2     | <ul style="list-style-type: none"> <li>–First appearance: Interrupt therapy until resolved to grade 0 or 1 and maintain the dose level for the next treatment at 100%</li> <li>–Second appearance: Interrupt therapy until resolved to grade 0 or 1 and maintain the dose level for the next treatment at 75%</li> <li>–Third appearance: Interrupt therapy until resolved to grade 0 or 1 and maintain the dose level for the next treatment at 50%</li> <li>–Fourth appearance: Discontinue therapy permanently</li> </ul> |

|   |                                                                                                                                                                                                                                                                                                                                                                           |
|---|---------------------------------------------------------------------------------------------------------------------------------------------------------------------------------------------------------------------------------------------------------------------------------------------------------------------------------------------------------------------------|
| 3 | <ul style="list-style-type: none"> <li>–First appearance: Interrupt therapy until resolved to grade 0 or 1 and begin the next cycle at 75% of the starting dose</li> <li>–Second appearance: Interrupt therapy until resolved to grade 0 or 1 and begin the next cycle at 50% of the starting dose</li> <li>–Third appearance: Discontinue therapy permanently</li> </ul> |
| 4 | <p>First appearance: Discontinue therapy permanently, or if the physician deems it to be in the patient's best interest to continue, interrupt until resolved to grade 0 or 1 and begin the next cycle at 50% of the starting dose</p>                                                                                                                                    |

1280

1281 **4.3.3 Concomitant and Prophylactic Medication**

1282 In addition to HFS, the other common toxicities of capecitabine are  
1283 diarrhea and stomatitis. Symptom-relieving treatment can be given  
1284 by investigators according to clinical need and should be recorded.  
1285 Dose adjustment is not required for patients with mild to moderate  
1286 hepatic impairment. Currently there are no data on the  
1287 pharmacokinetics of capecitabine in patients with renal dysfunction  
1288 (as evaluated by serum creatinine levels).

1289 Mild myelosuppression related to capecitabine and the  
1290 predominance of its active metabolic enzymes inside tumor cells  
1291 mean that, hematologic toxicities of grade  $\leq 2$  can be managed  
1292 according to clinical routine without discontinuation of capecitabine.  
1293 For patients experiencing hematologic toxicities of grade  $\geq 3$ ,  
1294 capecitabine should be interrupted until resolved to grade 0.  
1295 Treatment should be terminated if dosage interruption occurs for

1296 more than 4 weeks. Treatment should be terminated if patients  
1297 experience two episodes of grade  $\geq 3$  hematological toxicities  
1298 consecutively, with any episode resulting in drug discontinuation for  
1299 more than 2 weeks. Patient should be followed-up after termination  
1300 of therapy and toxicities and prognosis should be recorded.

1301

## 1302 **5. SELECTION OF SUBJECTS**

### 1303 **5.1 Enrollment**

1304 All patients meeting the inclusion criteria must be provided with  
1305 detailed information about this study and written informed consent  
1306 for participation must be obtained. The patients will then be  
1307 randomly assigned into the observation arm or capecitabine arm  
1308 using a random number table, and the assignment will be recorded  
1309 on the case report form (CRF) by investigators. Analysis will be  
1310 stratified by lymph node status (N0 or N+).

1311

### 1312 **5.2 Inclusion Criteria**

1313 Patients must fulfill **ALL** of the following criteria to be eligible for  
1314 study enrollment and randomization.

- 1315 1) Female, aged  $\geq 18$  years old and  $\leq 70$  years old.
- 1316 2) Histologically confirmed invasive ductal carcinoma, no specific



- 1317 type (NOS).
- 1318 3) Stage Ib–IIIc (N3 not including internal mammary or  
1319 supraclavicular nodes involvement).
- 1320 4) ER–, PR–, and HER2–negative (ER– and PR–negative is  
1321 defined by lower than 1% immunohistochemistry (IHC)  
1322 staining; HER2 negative is define by an IHC score of 0,1 or 2  
1323 with HER2–fluorescence *in situ* hybridization negative).
- 1324 5) Have completed adequate surgery, neo-/adjuvant  
1325 chemotherapy and radiation therapy (if indicated).
- 1326 6) Available results of contralateral mammography, chest X–ray,  
1327 abdominal ultrasonography, and <sup>99m</sup>Tc–bone scanning within 3  
1328 months before randomization.
- 1329 7) Adequate organ function:
- 1330 d) Bone marrow: ANC  $\geq 1.5 \times 10^9/L$ ; platelet count  $\geq$   
1331  $100 \times 10^9/L$ ; hemoglobin  $\geq 10$  g/dL
- 1332 e) Renal function: serum creatinine  $\leq 1.5 \times ULN$  by local  
1333 laboratory
- 1334 f) Hepatic function: total bilirubin  $\leq 1.5 \times ULN$ ; AST  $\leq$   
1335  $1.5 \times ULN$ , ALT  $\leq 1.5 \times ULN$
- 1336 8) Compliance with study protocol.
- 1337 9) Providing written informed and signed consent.

1338

1339 **5.3 Exclusion Criteria**

1340 Patients meeting **ANY** of the following criteria are not eligible for  
1341 study enrollment and randomization.

1342 1) Inflammatory or bilateral breast cancer.

1343 2) Other previously diagnosed other malignancies (not including  
1344 cured cervical carcinoma *in situ*, cutaneous squamous cell  
1345 carcinoma, and cutaneous basal cell carcinoma).

1346 3) History of invasive breast cancer.

1347 4) Patients who are receiving or will receive other biological  
1348 agents or immunotherapy.

1349 5) Severe dysfunction of the heart, lung, liver, or kidney.

1350 6) Patients with malabsorption syndrome diseases impairing GI  
1351 function, resection of stomach or small intestine, or unable to  
1352 swallow capecitabine tablets.

1353 7) Patient who are pregnant or who are unwilling to use  
1354 contraception during the study period.

1355 8) Known intolerance to capecitabine or allergy to its excipients.

1356

1357 **5.4 Discontinuation Criteria**

1358 1) Recurrence of breast cancer.

- 1359 2) Development of serious AEs.
- 1360 3) Patients desire to withdraw from the study.
- 1361 4) Patients are unable to receive treatment or follow-up  
1362 according to the study protocol.
- 1363 5) Patients receive other anti-tumor treatment or other treatment  
1364 that might affect the study results without the consent of the  
1365 investigators.
- 1366 6) Dosage discontinuation for more than 28 days.

1367

## 1368 **6. STUDY PROTOCOL**

### 1369 **6.1 Study Drug:**

1370 Capecitabine (Xeloda<sup>®</sup>, Roche, Basel, Switzerland), 500mg per  
1371 tablet. The treatment schedule is described in section 4.3

1372

### 1373 **6.2 Assessment and Follow-up**

1374 The schedule of assessment during treatment and follow-up  
1375 are shown in Appendix 1.

1376

#### 1377 **6.2.1 Baseline Assessment**

1378 Baseline assessment should complete within 1 week before  
1379 enrollment.

- 1380 ✓ Screening form. Patients who meet all inclusion criteria and  
1381 do not meet any exclusion criteria are eligible for this study.  
1382 Investigators must complete a screening form at baseline.
- 1383 ✓ Medical history and clinical examination. Medical history,  
1384 including risk factors for cardiac disease and their medical  
1385 history of nervous system diseases must be collected before  
1386 enrollment.
- 1387 ✓ Complete blood count, hepatic function (including AST, ALT,  
1388 T-Bil, D-Bil, TP, and ALB), renal function (including BUN  
1389 and Cr), serum electrolytes (including K<sup>+</sup> and Ca<sup>2+</sup>), serum  
1390 LDH, AKP, and blood glucose.
- 1391 ✓ Electrocardiogram and echocardiogram;
- 1392 ✓ Serum CEA and CA153;
- 1393 ✓ Imaging studiesy including chest X-ray, and abdominal  
1394 ultrasonography. A Bone ECT scan is recommended for  
1395 patients with disease of stage ≥ IIB, unexplained bone pain,  
1396 or elevated serum ALP
- 1397 ✓ 10 mL of peripheral blood was collected for biomarker  
1398 analysis.

1399

## 1400 **6.2.2 Assessment during Treatment**

1401 Assessment during treatment are to repeat every 3 months.

1402 ✓ Physical examination and vital signs;

1403 ✓ Complete blood count, hepatic function, and renal function;

1404 ✓ Serum CEA and CA153;

1405 ✓ Electrocardiogram;

1406 ✓ Abdominal ultrasonography.

1407

### 1408 **6.2.3 Assessment during Follow-up**

1409 Several randomized studies have shown that regular examination  
1410 comprising bone scans, liver US, chest X-rays, and blood tests  
1411 could not improve the survival and quality of life (QoL) of patients,  
1412 compared with routine physical examination [46, 47]. Therefore,  
1413 every 3 months during follow-up, physical examination and  
1414 mammography are required for asymptomatic patients in both arms.  
1415 However, this is the minimum requirement specified by the protocol,  
1416 and investigators are allowed to perform additional evaluations  
1417 according to the individual situation of the patients.

1418

### 1419 **6.2.4 Follow-up**

1420 Follow-up of patients in both arms will be initiated after  
1421 randomization and will be repeated every 3 months ( $\pm$  28 days)

1422 during the first 2 years after randomization. Patients in the  
1423 capecitabine arm are allowed to take medicine at home but must  
1424 return to the study site every 3 months ( $\pm$  28 days) for follow-up.  
1425 Follow-up will be repeated every 6 months ( $\pm$  28 days) during the  
1426 3rd to 5th year after randomization, and then annually thereafter.

1427 Diagnosis of relapse will be established on clinical manifestation,  
1428 radiological findings, and/or histological evidence. If the diagnosis  
1429 of relapse is based on clinical symptoms without laboratory or  
1430 radiological evidence, other supporting evidence should be  
1431 collected as much as possible. After a diagnosis of recurrence is  
1432 established, the sites and date of relapse should be recorded.

1433 Diagnosis of relapse could also be established if the treatment  
1434 strategy is altered based on the hypothesis of relapse, even without  
1435 adequate evidence.

1436 Chest wall relapse: Defined as soft tissue recurrence in the area  
1437 comprising the sternum as the middle line, the clavicle as the upper  
1438 margin, the rib as the lower margin, and the posterior axillary line as  
1439 lateral margin.

1440 Regional relapse: Defined as relapse in the area of the  
1441 supraclavicular fossa, subclavicular area, ipsilateral internal  
1442 mammary area, and/or ipsilateral axillary lymph nodes. Tissue

1443 biopsy should be performed whenever possible.

1444 Distant metastases: Cutaneous or subcutaneous metastasis  
1445 should be supported by histological or cytological evidence. Bone  
1446 metastasis should be supported by imaging studies (e.g., X-ray or  
1447 MR). Metastasis in the lung, liver, or brain should be supported by  
1448 CT or MRI.

1449

## 1450 **7. SAFETY ASSESSMENT**

### 1451 **7.1 Adverse Events**

#### 1452 **7.1.1 Definition of Adverse Events**

1453 An AE is defined as any untoward medical occurrence during the  
1454 period from randomization to the 28<sup>th</sup> day after the last dose or to  
1455 the most recent follow-up, regardless of causal attribution with the  
1456 study drug. An AE can be any of the following: A symptom, a sign,  
1457 abnormal examination results, or a disease, which may occur at  
1458 any time since the initiation of treatment.

1459 An AE should be accurately recorded during the study, including  
1460 its time, severity, duration, management, and prognosis.

1461

#### 1462 **7.1.2 Severity of AEs**

1463 Severity of AEs is graded according to NCI CTCAE 4.0 (Appendix

1464 2). Grades of AEs that are not listed in Appendix 2 are as follows:

- 1465 ● Mild: An effect on the daily function of subjects.
- 1466 ● Moderate: A mild effect on the daily function of subjects.
- 1467 ● Severe: A significant effect on the daily function of subjects.

1468

### 1469 **7.1.3 Association between AEs and Study Treatment**

1470 The relationship between AEs and the study drug should be  
1471 assessed by investigators according to the following criteria:

1472       Definitely related: An AE that follows a reasonable temporal  
1473 sequence from administration of the study intervention, follows a  
1474 known or expected response pattern to the suspected intervention,  
1475 and is confirmed by improvement on stopping and reappearance of  
1476 the event on repeated exposure

1477       Probably related: An AE that follows a reasonable temporal  
1478 sequence from administration of the study intervention, follows a  
1479 known or expected response pattern to the suspected intervention,  
1480 but that could readily have been produced by the patient's clinical  
1481 conditions or other treatments.

1482       Probably unrelated: An AE that does not follow a reasonable  
1483 temporal sequence from administration of the study intervention,  
1484 does not follow a known or expected response pattern to the



1485 suspected intervention, and could readily have been produced by  
1486 the patient's clinical conditions or other treatments.

1487 Unrelated: An AE that does not follow a reasonable temporal  
1488 sequence from administration of the study intervention, but follows  
1489 a known or expected response pattern to other treatments, and  
1490 could readily have been produced by the patient's clinical  
1491 conditions or other treatments. The AE can be relieved by  
1492 improvement of the clinical conditions or stopping other treatments,  
1493 and reappears after repeating other treatments.

1494 Unable to determine: An AE that does not follow a reasonable  
1495 temporal sequence from administration of the study intervention,  
1496 but follows a known or expected response pattern to the study  
1497 intervention, and could readily have been produced by other  
1498 treatments.

1499

## 1500 **7.2 Serious Adverse Events (SAEs)**

### 1501 **7.2.1 Definition of SAEs**

- 1502 ● Results in death.
- 1503 ● Is life-threatening.
- 1504 ● Requires or prolongs hospitalization.
- 1505 ● Causes persistent or significant disability or incapacity.

1506 ● Results in congenital anomalies or birth defects.

1507

### 1508 **7.2.2 SAEs Reporting**

1509 Any SAEs occurring during the study or follow-up should be  
1510 reported to the PI and ethics committee by telephone within 24  
1511 hours regardless of their causal relationship with the study drug.  
1512 The PI is responsible of reporting SAEs to the State Food and Drug  
1513 Administration (SFDA) (also to the drug manufacturer within 24  
1514 hours if the SAE is considered to be related to the study drug).

1515

## 1516 **8. STATISTICS**

1517 Additional details of the analysis will be provided in the statistical  
1518 analysis plan.

### 1519 **8.1 Statistical Methods**

1520 The primary endpoint is DFS, defined as time from randomization  
1521 to the first of breast cancer recurrence or death from any reason.

1522 The secondary endpoints include OS, DDFS, LRFS, and safety.

1523 Efficacy analyses will be based on the FAS population, defined  
1524 as all randomized patients excluding those who withdraw informed  
1525 consent before protocol treatment, or who had no follow-up data  
1526 after randomization. Safety analyses will be based on the safety

1527 analyses set (SAS) population, defined as all randomized patients  
1528 who initiated the protocol treatment and who undergo safety  
1529 assessment.

1530 For the efficacy analysis, PFS, OS, DDFS, and LRFS will be  
1531 analyzed using the Kaplan–Meier method and will be compared  
1532 using the log–rank test. The hazard ratio and corresponding 95%  
1533 confidence interval will be calculated using stratified Cox  
1534 proportional hazard regression.

1535 AEs and SAEs will be summarized by arm. The incidence of  
1536 grade 3 HFS will be compared between the two arms using Fisher’s  
1537 exact test.

1538 For continuous variables, the distribution, mean, median,  
1539 standard deviation, and interquartile rang (IQR) will be calculated  
1540 and compared using a *t*–test or non–parametric test. For  
1541 categorical variables, the number and percentage will be presented  
1542 in contingency table data and compared using the chi–squared test  
1543 or Fisher's exact test.

1544 All statistical tests are two–sided with a *P* value of < 0.05 being  
1545 considered statistically significant.

1546

## 1547 **8.2 Sample Size**

1548 The assumptions for sample size calculations as the follows:  
1549 5–year DFS is 68% in the control arm [10, 13, 28], and 80% in the  
1550 experimental arm. The estimated period of enrollment and  
1551 follow–up will be 72 and 36 months, respectively. The design is  
1552 based on a 2–sided log–rank test with  $\alpha = 0.05$ , power = 80%.  
1553 The dropout rate is assumed to be 9%. Approximately 424 patients  
1554 (212 patients in each arm) will be enrolled.

1555

## 1556 **9. Ethics**

### 1557 **9.1 Informed Consent**

1558 Before enrollment, study physicians are responsible for a complete  
1559 and comprehensive presentation to patients of the study purpose,  
1560 the properties of the drug, its possible side effects and potential  
1561 risks. Patients should be informed of their rights, risk, and benefit. It  
1562 should be emphasized that they can withdraw from the trial at any  
1563 stage of the trial without affecting their subsequent treatment.  
1564 Subjects should be promptly informed of any updates of the study,  
1565 and a renewed informed consent to continue in the study should be  
1566 obtained. Patients should sign the informed consent in duplicate  
1567 with their name and date. The two copies are given to the patient  
1568 and kept in study archives, respectively.

1569

1570 **9.2 Ethic Policies and Regulations**

1571 The investigator will ensure that this study is conducted in full  
1572 conformance with the principles of the “Declaration of Helsinki” as  
1573 well as “Guideline for Good Clinical Practice (GCP)” and relevant  
1574 laws and regulations of the SFDA, whichever affords the greater  
1575 protection to the individual.

1576 The study will be initiated only after the protocol is approved by the  
1577 ethics committee of the Sun Yat–sen University Cancer Center. Any  
1578 changes to the protocol during the study should be reported to the  
1579 ethics committee and filed.

1580

1581 **9.3 Protocol Modifications**

1582 All protocol modifications must be submitted to the Independent  
1583 Ethics Committee (IEC). Approval must be awaited before any  
1584 changes can be implemented, except for changes necessary to  
1585 eliminate an immediate hazard to the trial patients, or when the  
1586 change involve only logistical or administrative aspects of the trial.

1587

1588 **10. QUALITY ASSURANCE**

1589 To ensure accordance with study protocols, physicians are asked to

1590 strictly follow the requirements of GCP throughout the trial, to  
1591 achieve standard procedures, accurate data, and reliable  
1592 conclusions. Specific requirements are as follows:

1593 ✓ Obtain informed consent that is signed by each subject or  
1594 their agents.

1595 ✓ Complete the case report form (CRF) as required.

1596 ✓ Follow-up on schedule.

1597 ✓ Keep complete records of laboratory examinations, clinical  
1598 records, and the original medical documents of the subjects.

1599

## 1600 **11. DATA PROCESSING AND STORAGE**

### 1601 **11.1 Case Report Form (CRF)**

1602 The CRF will be completed by investigators in a timely manner to  
1603 ensure the accuracy and timeliness of the content. Generally, the  
1604 CRF should not be altered. If there are any errors to be corrected,  
1605 the original record should be crossed out with a horizontal line, and  
1606 the modified text should be signed and dated. The completed CRFs  
1607 are reviewed by the quality control officer for data input. No further  
1608 modification of CRFs is allowed once the database is locked.

1609

### 1610 **11.2 Database Establishment**

1611 Statisticians will have questions in the CRFs checked with  
1612 investigators, who should reply and return the CRFs promptly.  
1613 Statisticians should establish the database in a timely manner, and  
1614 the data will be locked by investigators, statisticians, and research  
1615 assistants after the database has been reviewed. To ensure data  
1616 security, a non-permitted person cannot modify the data, and the  
1617 data must be backed up.

1618

### 1619 **11.3 Data Storage**

1620 Investigators should keep the data intact. According to the principle  
1621 of GCP in China, research data should be stored for at least five  
1622 years.

1623

1624 **12. REFERENCES**

- 1625 1. Perou CM, Sorlie T, Eisen MB, et al.: Molecular portraits of  
1626 human breast tumours. *Nature* 2000, 406: 747–752.
- 1627 2. Sorlie T. Molecular portraits of breast cancer: tumour subtypes  
1628 as distinct disease entities. *Eur J Cancer* 2004; 406: 2667–75.
- 1629 3. Sorlie T, Perou CM, Tibshirani R, et al.: Gene expression  
1630 patterns of breast carcinomas distinguish tumor subclasses  
1631 with clinical implications. *Proc Natl Acad Sci USA* 2001, 98:  
1632 10869–10874.
- 1633 4. Sotiriou C, Neo SY, McShane LM, et al. Breast cancer  
1634 classification and prognosis based on gene expression profiles  
1635 from a population–based study. *PNAS*, 2003; 100(18):  
1636 10393–10398
- 1637 5. Weigelt B, Glas AM, Wessels LF, et al. Gene expression  
1638 profiles of primary breast tumors maintained in distant  
1639 metastases. *Proc Natl Acad Sci USA*. 2003; 100(26): 15901–5.
- 1640 6. Abd El–Rehim DM, Pinder SE, Paish CE, et al. Expression of  
1641 luminal and basal cytokeratins in human breast carcinoma. *J*  
1642 *Pathol*. 2004; 203(2): 661–71.
- 1643 7. Jacquemier J, Ginestier C, Rougemont J, et al. Protein  
1644 expression profiling identifies subclasses of breast cancer and  
1645 predicts prognosis. *Cancer Res*. 2005; 65(3): 767–79.
- 1646 8. Nielsen TO, Hsu FD, Jensen K, et al. Immunohistochemical  
1647 and clinical characterization of the basal–like subtype of  
1648 invasive breast carcinoma. *Clin Cancer Res*. 2004; 10:  
1649 5367–5374.
- 1650 9. Sørliie T, Tibshirani R, Parker J, et al. Repeated observation of  
1651 breast tumor subtypes in independent gene expression data



- 1652 sets. PNAS, 2003; 100(14): 8418–23.
- 1653 10. Dent R, Trudeau M, Pritchard KI et al. Triple–negative breast  
1654 cancer: clinical features and patterns of recurrence. Clin.  
1655 Cancer Res. 2007; 13; 4429–4434.
- 1656 11. Tischkowitz M, Brunet JS, Begin LR et al. Use of  
1657 immunohistochemical markers can refine prognosis in triple  
1658 negative breast cancer. BMC Cancer 2007; 7; 134.
- 1659 12. Bauer KR, Brown M, Cress RD, et al. Descriptive analysis of  
1660 estrogen receptor (ER)–negative, progesterone receptor  
1661 (PR)–negative, and HER2–negative invasive breast cancer,  
1662 the so–called triple–negative phenotype: a population–based  
1663 study from the California cancer Registry. Cancer 2007; 109;  
1664 1721–1728.
- 1665 13. Haffty BG, Yang Q, Reiss M, et al. Locoregional Relapse and  
1666 Distant Metastasis in Conservatively Managed Triple Negative  
1667 Early-Stage Breast Cancer. J Clin Oncol 2006;24(36):5652-7.
- 1668 14. Carey LA, Dees EC, Sawyer L, et al: The triple negative  
1669 paradox: Primary tumor chemosensitivity of breast cancer  
1670 subtypes. Clin Cancer Res, 2007; 13:2329–2334.
- 1671 15. Abd El–Rehim DM, Ball G, Pinder SE, et al. High–throughput  
1672 protein expression analysis using tissue microarray technology  
1673 of a large well–characterised series identifies biologically  
1674 distinct classes of breast cancer confirming recent cDNA  
1675 expression analyses. Int J Cancer 2005; 116: 340–50.
- 1676 16. van de Rijn M, Perou CM, Tibshirani R, et al. Expression of  
1677 cytokeratins 17 and 5 identifies a group of breast carcinomas  
1678 with poor clinical outcome. Am J Pathol 2002; 161:1991–96.
- 1679 17. Banerjee S, Reis–Filho JS, Ashley S, et al. Basal–like breast

- 1680 carcinomas: clinical outcome and response to chemotherapy. J  
1681 Clin Pathol 2006; 59: 729–35.
- 1682 18. Rodriguez–Pinilla SM, Sarrío D, Honrado E, et al. Prognostic  
1683 significance of basal–like phenotype and fascin expression in  
1684 node negative invasive breast carcinomas. Clin Cancer Res  
1685 2006; 12: 1533–39.
- 1686 19. Tsuda H, Takarabe T, Hasegawa F, et al. Large, central cellular  
1687 zones indicating myoepithelial tumor differentiation in  
1688 high–grade invasive ductal carcinomas as markers of  
1689 predisposition to lung and brain metastases. Am J Surg Pathol  
1690 2000; 24: 197–202.
- 1691 20. Korsching E, Packeisen J, Agelopoulos K, et al. Cytogenetic  
1692 alterations and cytokeratin expression patterns in breast  
1693 cancer: integrating a new model of breast differentiation into  
1694 cytogenetic pathways of breast carcinogenesis. Lab Invest  
1695 2002; 82: 1525–33.
- 1696 21. Fulford LG, Easton DF, Reis–Filho JS, et al. Specific  
1697 morphological features predictive for the basal phenotype in  
1698 grade 3 invasive ductal carcinoma of breast. Histopathology  
1699 2006; 49; 22–34.
- 1700 22. Livasy CA, Karaca G, Nanda R et al. Phenotypic evaluation of  
1701 the basal–like subtype of invasive breast carcinoma. Mod.  
1702 Pathol. 2006; 19; 264–271.
- 1703 23. Jacquemier J, Padovani L, Rabayrol L et al. Typical medullary  
1704 breast carcinomas have a basal / myoepithelial phenotype. J.  
1705 Pathol. 2005; 207; 260–268.
- 1706 24. Rakha EA, El–Sayed ME, Green AR et al. Prognostic markers  
1707 in triple–negative breast cancer. Cancer 2007; 109; 25–32.

- 1708 25. Early Breast Cancer Trialists' Collaborative Group (EBCTCG).  
1709 Effects of chemotherapy and hormonal therapy for early breast  
1710 cancer on recurrence and 15-year survival: an overview of the  
1711 randomised trials. *Lancet*. 2005; 365(9472): 1687–717.
- 1712 26. Dahabreh IJ, Linardou H, Siannis F, Fountzilas G, Murray S.  
1713 Trastuzumab in the adjuvant treatment of early-stage breast  
1714 cancer: a systematic review and meta-analysis of randomized  
1715 controlled trials. *Oncologist*. 2008;13(6):620–30.
- 1716 27. Cole BF, Gelber RD, Gelber S, Coates AS, Goldhirsch A.  
1717 Polychemotherapy for early breast cancer: an overview of the  
1718 randomised clinical trials with quality-adjusted survival analysis.  
1719 *Lancet* 2001; 358(9278): 277-86.
- 1720 28. Liedtke C, Mazouni C, Hess KR, et al. Response to  
1721 neoadjuvant therapy and long-term survival in patients with  
1722 triple-negative breast cancer. *J Clin Oncol*. 2008; 26(8):  
1723 1275–81.
- 1724 29. Rouzier R, Perou CM, Symmans WF, et al. Breast Cancer  
1725 Molecular Subtypes Respond Differently to Preoperative  
1726 Chemotherapy. *Clin Cancer Res*, 2005; 11(16): 5678–5685.
- 1727 30. Browder T, Butterfield CE, Kräling BM, et al. Antiangiogenic  
1728 scheduling of chemotherapy improves efficacy against  
1729 experimental drug-resistant cancer. *Cancer Res* 2000; 60:  
1730 1878–86.
- 1731 31. Klement G, Baruchel S, Rak J, et al. Continuous low-dose  
1732 therapy with vinblastine and vegf receptor-2 antibody induces  
1733 sustained tumor regression without overt toxicity. *J Clin Invest*  
1734 2000; 105: R15–24
- 1735 32. Ghiringhelli F, Menard C, Puig PE, et al. Metronomic

- 1736 cyclophosphamide regimen selectively depletes CD4+ CD25+  
1737 regulatory T cells and restores T and NK effector functions in  
1738 end stage cancer patient. *Cancer Immunol Immunother* 2006;  
1739 56: 641–8.
- 1740 33. Colleoni M, Rocca A, Sandri MT, et al. Low-dose oral  
1741 methotrexate and cyclophosphamide in metastatic breast  
1742 cancer: antitumor activity and correlation with vascular  
1743 endothelial growth factor levels. *Ann Oncol* 2002; 13: 73–80.
- 1744 34. Colleoni M, Orlando L, Sanna G, et al. Metronomic low-dose  
1745 oral cyclophosphamide and methotrexate plus or minus  
1746 thalidomide in metastatic breast cancer: antitumor activity and  
1747 biological effects. *Ann Oncol* 2006; 17: 232–8.
- 1748 35. Orlando L, Cardillo A, Rocca A, et al. Prolonged clinical benefit  
1749 with metronomic chemotherapy in patients with metastatic  
1750 breast cancer. *Anticancer Drugs* 2006; 17: 961–7.
- 1751 36. Emmenegger U, Man S, Shaked Y, et al. A comparative  
1752 analysis of low-dose metronomic cyclophosphamide reveals  
1753 absent or low-grade toxicity on tissues highly sensitive to the  
1754 toxic effects of maximum tolerated dose regimens. *Cancer Res*  
1755 2004; 64: 3994–4000.
- 1756 37. Blum JL, Dieras V, Lo Russo PM et al. Multicenter, phase II  
1757 study of capecitabine in taxane-pretreated metastatic breast  
1758 carcinoma patients. *Cancer* 2001; 92: 1759–68.
- 1759 38. Reichardt P, Von Minckwitz G, Thuss-Patience PC et al.  
1760 Multicenter phase II study of oral capecitabine (Xeloda) in  
1761 patients with metastatic breast cancer relapsing after  
1762 treatment with a taxane-containing therapy. *Ann Oncol* 2003;  
1763 14: 1227–33.

- 1764 39. O'Shaughnessy J, Miles D, Vukelja S et al. Superior survival  
1765 with capecitabine plus docetaxel combination therapy in  
1766 anthracyclinepretreated patients with advanced breast cancer:  
1767 Phase III trial results. *J Clin Oncol* 2002; 20: 2812–23.
- 1768 40. Leonard R, O'Shaughnessy J, Vukelja S, et al. Detailed  
1769 analysis of a randomized Phase III trial: can the tolerability of  
1770 capecitabine plus docetaxel be improved without  
1771 compromising its survival advantage? *Ann Oncol*. 2006; 17(9):  
1772 1379–85.
- 1773 41. Blum JL, Jones SE, Buzdar AU, et al. Multicenter phase II  
1774 study of capecitabine in paclitaxel– refractory metastatic  
1775 breast cancer. *J Clin Oncol*. 1999; 17(2): 485–93.
- 1776 42. Stockler MR, Harvey VJ, Francis PA, et al. Capecitabine  
1777 versus classical cyclophosphamide, methotrexate, and  
1778 fluorouracil as first-line chemotherapy for advanced breast  
1779 cancer. *J Clin Oncol* 2011; 29: 4498-504.
- 1780 43. Martin M, Calvo L, Martinez N, et al. Standard Versus  
1781 Continuous Administration of Capecitabine in Metastatic  
1782 Breast Cancer (GEICAM/2009-05): A Randomized,  
1783 Noninferiority Phase II Trial With a Pharmacogenetic Analysis.  
1784 *Oncologist* 2015; 20(2): 111-2.
- 1785 44. Blum JL, Jones SE, Buzdar AU. Blum J, Jones S, Buzdar A.  
1786 Capecitabine (Xeloda) in 162 patients with  
1787 paclitaxel-pretreated mbc: updated results and analysis of  
1788 dose modification. *Eur J Cancer* 2001; 37(6): S190-S.
- 1789 45. Rosselli Del Turco M, Palli D, Cariddi A, et al. Intensive  
1790 diagnostic follow–up aftertreatment of primary breast cancer. A  
1791 randomized trial. National Research Council Project on Breast

1792 Cancer follow-up. JAMA 1994; 271:1593-7

1793 46. Rosselli Del Turco M, Palli D, Cariddi A, Ciatto S, Pacini P,  
1794 Distante V. Intensive diagnostic follow-up after treatment of  
1795 primary breast cancer. A randomized trial. National Research  
1796 Council Project on Breast Cancer follow-up. Jama 1994;  
1797 271(20): 1593-7

1798 47. Impact of follow-up testing on survival and health-related  
1799 quality of life in breast cancer patients. A multicenter  
1800 randomized controlled trial. The GIVIO Investigator. JAMA  
1801 1994; 271:1587-92.

1802

1803

1804

1805

1806

**13. APPENDIX 1**

1807

**Schedule of the study**

|                                  | Baseline<br>(within 7<br>days before<br>enrollment) | Treatment | End of<br>treatment | Follow-up<br>(d)              |                               |
|----------------------------------|-----------------------------------------------------|-----------|---------------------|-------------------------------|-------------------------------|
| Informed consent                 | √                                                   |           |                     |                               |                               |
| Screening form                   | √                                                   |           |                     |                               |                               |
| Blood samples                    | √                                                   | √         | √                   | as<br>clinically<br>indicated |                               |
| Medical records and examinations |                                                     |           |                     |                               |                               |
| Observations                     | Medical history(a)                                  | √         |                     |                               |                               |
|                                  | Physical examination                                | √         | √                   | √                             |                               |
|                                  | Vital signs                                         | √         | √                   | √                             |                               |
|                                  | ECOG score                                          | √         | √                   | √                             |                               |
|                                  | Complete blood count                                | √         | √                   | √                             | as<br>clinically<br>indicated |
|                                  | Blood chemistry test(b)                             | √         | √                   | √                             | as<br>clinically<br>indicated |
|                                  | Coagulation function (4 items)                      | √         | √                   | √                             | as<br>clinically<br>indicated |
|                                  | CEA/CA153                                           | √         | √                   | √                             | as<br>clinically<br>indicated |
|                                  | Electrocardiogram                                   | √         | √                   | √                             | as<br>clinically<br>indicated |

|  |                                         |   |   |   |                         |
|--|-----------------------------------------|---|---|---|-------------------------|
|  | Echocardiogram                          | √ |   | √ | as clinically indicated |
|  | Imaging examination(c)                  | √ |   | √ | as clinically indicated |
|  | Adverse events                          |   | √ | √ | √                       |
|  | Concomitant medication                  |   | √ | √ | √                       |
|  | Assessment of recurrence and metastasis |   | √ | √ | √                       |

1808

1809 **NOTES:**

1810 a) Medical history: Risk factors of heart disease and history of nervous system  
1811 disease should be recorded;

1812 b) Blood chemistry tests: Hepatic function (AST, ALT, T-Bil, D-Bil, TP, and  
1813 ALB), renal function (BUN and Cr), serum electrolytes (K<sup>+</sup> and Ca<sup>2+</sup>), serum  
1814 LDH and AKP, and serum glucose.

1815 c) Imaging examination: Including chest X-ray and abdominal ultrasonography.  
1816 Bone ECT scan is recommended for patients with disease of stage ≥ IIB,  
1817 unexplained bone pain, or elevated serum ALP; Mammography is repeated  
1818 annually;

1819 d) Follow-up is repeated every 3 months (± 28 days) during the first 2 years  
1820 after randomization, every 6 months (± 28 days) during the 3rd to 5th year  
1821 after randomization, and then annually thereafter.

1822

1823



1824 **APPENDIX 2 Common Terminology Criteria for Adverse Events v4.0**

1825 ✓ The CTCAE v4.0 manual can be found at the following URL:

1826 <http://ctep.cancer.gov/forms/CTCAEv4.pdf>.

1827

1828

1829

1830

### SYSUCC–001 Study Protocol Amendment List

1831

| page  | item            | Before amendment<br>(Protocol Ver.2.0<br>November 30, 2012)                                  | After amendment<br>(Protocol Ver.3.0<br>January 9, 2017) | Reasons                                                                                                                        |
|-------|-----------------|----------------------------------------------------------------------------------------------|----------------------------------------------------------|--------------------------------------------------------------------------------------------------------------------------------|
| cover |                 | Ver.2.0 approved date:<br>November 30, 2012                                                  | Ver.3.0 approved date:<br>January 9, 2017                | –                                                                                                                              |
| P76   | 8.2 Sample size | An interim analysis when<br>the last one patient has<br>completed 18 months of<br>follow–up. | (None)                                                   | The number of DFS events was<br>much lower than expected after the<br>last one patient has completed 12<br>months of follow–up |

1832

1833

| page  | item                                   | Before amendment<br>(Protocol Ver.1.0<br>April 5, 2010)            | After amendment<br>(Protocol Ver.2.0<br>October 20, 2012)          | Reasons                                                                                                                                                                    |
|-------|----------------------------------------|--------------------------------------------------------------------|--------------------------------------------------------------------|----------------------------------------------------------------------------------------------------------------------------------------------------------------------------|
| Cover | Cover                                  | Ver.1.0 approved date:<br>April 5, 2010                            | Ver.2.0 approved date:<br>October 20, 2012                         | –                                                                                                                                                                          |
| P5    | 1.1 Study Design                       | 684 subjects will be randomized in a 1:1 fashion (342 in each arm) | 424 subjects will be randomized in a 1:1 fashion (212 in each arm) | Considering the influence of duration of enrollment and follow-up on sample size, also too high drop-out rate                                                              |
| P6    | 1.3 Main Inclusion/Exclusion Criteria□ | 1) Female, aged $\geq 18$ years old and $\leq 75$ years.           | 1) Female, aged $\geq 18$ years old and $\leq 70$ years.           | Fewer patients and poorer compliance                                                                                                                                       |
| P6    | 1.3 Main Inclusion/Exclusion Criteria  | 3) Pathologic stage $T_{1c-3}N_{0-2}M_0$                           | 3) Pathologic stage $T_{1b-3}N_{0-3}M_0$                           | Findings from retrospective studies showed the number of positive lymph nodes could not be used for predicting the survival rate. Adjuvant chemotherapy was recommended to |

|     |                                        |                                                                                                                               |                                                                                                                                                             |                                                                                                               |
|-----|----------------------------------------|-------------------------------------------------------------------------------------------------------------------------------|-------------------------------------------------------------------------------------------------------------------------------------------------------------|---------------------------------------------------------------------------------------------------------------|
|     |                                        |                                                                                                                               |                                                                                                                                                             | patients with T <sub>1b</sub> disease by NCCN guideline                                                       |
| P6  | 1.3 Main Inclusion/ Exclusion Criteria | 1) Patients with T4, including inflammatory carcinomas.                                                                       | 1) Patients with bilateral breast cancer, inflammatory carcinomas.                                                                                          | according to the American Joint Committee on Cancer 2010 staging system                                       |
| P7  | 1.3 Main Inclusion/ Exclusion Criteria | 2) Patients with N3.                                                                                                          | 2) Patients with positive supraclavicular or internal mammary lymph node.                                                                                   | Treatment for positive supraclavicular or internal mammary lymph node remains controversial                   |
| P14 | 4.1 Summary of Design                  | Approximately 684 subjects with TNBC will be randomized in a 1:1 fashion (342 in each arm) to receive treatment               | Approximately 424 subjects with TNBC will be randomized in a 1:1 fashion (212 in each arm) to receive treatment                                             | Considering the influence of duration of enrollment and follow-up on sample size, also too high drop-out rate |
| P14 | 4.1 Summary of Design                  | This study will be completed in approximately 84 months including 48 months for accrual and approximately 36 months follow-up | This study will be completed in approximately 96 months including 60 months for accrual and approximately 36 months follow-up survival for the last subject | Slower enrollment than expected                                                                               |

|     |                        |                                                                                                                                                                              |                                                                                                                                                                                      |           |
|-----|------------------------|------------------------------------------------------------------------------------------------------------------------------------------------------------------------------|--------------------------------------------------------------------------------------------------------------------------------------------------------------------------------------|-----------|
|     |                        | survival for the last subject enrolled.                                                                                                                                      | enrolled.                                                                                                                                                                            |           |
| P21 | 5.2 Inclusion Criteria | 1) Female, aged $\geq 18$ years old and $\leq 75$ years.                                                                                                                     | 1) Female, aged $\geq 18$ years old and $\leq 70$ years.                                                                                                                             | See above |
| P21 | 5.2 Inclusion Criteria | 3) Pathologic stage $T_{1c-3}N_{0-2}M_0$                                                                                                                                     | 3) Pathologic stage $T_{1b-3}N_{0-3}M_0$                                                                                                                                             | See above |
| P22 | 5.3 Exclusion Criteria | 1) Patients with T4, including inflammatory carcinomas.                                                                                                                      | 1) Patients with bilateral breast cancer, inflammatory carcinomas.                                                                                                                   | See above |
| P22 | 5.3 Exclusion Criteria | 2) Patients with N3.                                                                                                                                                         | 2) Patients with positive supraclavicular or internal mammary lymph node.                                                                                                            | See above |
| P32 | 8.2 Sample Size        | The estimated period of enrollment and follow-up will be 48 and 36 months, respectively. The design is based on 2-sided log-rank test with $\alpha=0.05$ , power=90%, and an | The estimated period of enrollment and follow-up will be 60 and 36 months, respectively. The design is based on 2-sided log-rank test with $\alpha=0.05$ , power=80%, and an interim | See above |

|  |  |                                                                                                                                                                                                 |                                                                                                                                                                                        |  |
|--|--|-------------------------------------------------------------------------------------------------------------------------------------------------------------------------------------------------|----------------------------------------------------------------------------------------------------------------------------------------------------------------------------------------|--|
|  |  | interim analysis when the last one patient has completed 12 months of follow-up. The dropout rate is assumed to be 20%. Approximately 684 patients (342 patients in each arm) will be enrolled. | analysis when the last one patient has completed 18 months of follow-up. The dropout rate is assumed to be 9%. Approximately 424 patients (212 patients in each arm) will be enrolled. |  |
|--|--|-------------------------------------------------------------------------------------------------------------------------------------------------------------------------------------------------|----------------------------------------------------------------------------------------------------------------------------------------------------------------------------------------|--|

1835

1836

## **STATISTICAL ANALYSIS PLAN**

1837

**TITLE:** A MULTICENTER, PHASE III  
RANDOMIZED STUDY OF  
METRONOMIC CAPECITABINE  
MAINTENANCE AFTER  
STANDARD TREATMENT IN  
PATIENTS WITH OPERABLE  
TRIPLE-NEGATIVE BREAST  
CANCER

**PROTOCOL NUMBER:** SYSUCC-EBC-CHEMO-001

**STUDY DRUG:** Capecitabine

**PLAN PREPARED BY:** Ying Guo and Ji-Bin Li

**PLAN VERSION:** 1.0

**APPROVAL DATE:** April 5, 2010

1838

1839

1840  
1841  
1842  
1843  
1844  
1845  
1846  
1847  
1848  
1849  
1850  
1851  
1852  
1853  
1854  
1855  
1856  
1857  
1858  
1859  
1860

# CONTENTS

|                                                        |     |
|--------------------------------------------------------|-----|
| <b>1. Background</b> .....                             | 97  |
| <b>2. Study Design</b> .....                           | 97  |
| <b>3. Randomization</b> .....                          | 99  |
| <b>4. Statistical Methods</b> .....                    | 99  |
| <b>4.1 Analysis Populations</b> .....                  | 99  |
| <b>4.1.1 Full Analysis Set (FAS) Population</b> .....  | 99  |
| <b>4.1.2 Per-Protocol Set (PPS) Population</b> .....   | 100 |
| <b>4.1.3 Safety Population</b> .....                   | 100 |
| <b>4.2 Efficacy Analysis</b> .....                     | 100 |
| <b>4.2.1 Analysis of the Primary Endpoint</b> .....    | 100 |
| <b>4.2.2 Analysis of the Secondary Endpoints</b> ..... | 102 |
| <b>4.2.3 Subgroup Analysis</b> .....                   | 103 |
| <b>4.2.4 Exploratory Analysis</b> .....                | 104 |
| <b>4.3 Safety Analysis</b> .....                       | 105 |
| <b>5. References</b> .....                             | 106 |



1861 **1. BACKGROUND**

1862 The SYSUCC–001 trial is a multicenter, phase III, randomized  
1863 controlled study to compare the efficacy and safety of metronomic  
1864 capecitabine maintenance for one year with observation after  
1865 standard local and systemic treatment in patients with operable  
1866 triple negative breast cancer (TNBC).

1867 The primary objective of this study is to evaluate whether the  
1868 addition of metronomic capecitabine maintenance to standard  
1869 alone treatment improves disease–free survival (DFS), compared  
1870 with standard treatment. Secondary objectives include determining  
1871 whether the addition of metronomic capecitabine maintenance to  
1872 standard treatment could improve overall survival (OS), distant  
1873 disease–free survival (DDFS), locoregional recurrence–free  
1874 survival (LRFS) and safety.

1875 The purpose of this Statistical Analysis Plan (SAP) is to provide the  
1876 details of the proposed analyses of the data collected during this  
1877 trial.

1878

1879 **2. STUDY DESIGN**

1880 The SYSUCC–001 trial is a multicenter, phase III, randomized  
1881 controlled study. A total of 684 patients will be enrolled from

1882 approximately 18 sites in China. Eligible patients will be  
1883 randomized between the two study arms in a 1:1 ratio.

1884

1885 The sample size of the study is primarily driven by the analysis of  
1886 DFS. To detect a hazard ratio (HR) of 0.58 in DFS (an estimated  
1887 improvement of 12% in the 5-year DFS from 68% in the control  
1888 arm to 80% in the capecitabine maintenance arm), approximately  
1889 148 DFS events will be required to achieve a statistical power of 90%  
1890 at a 2-sided significance level of 5%. The estimated periods of  
1891 enrollment and follow-up will be 48 and 36 months, respectively.  
1892 After considering a dropout rate of 20%, approximately 684 patients  
1893 (342 patients in each group) will be enrolled in the study [1-5].

1894

1895 **Interim Analyses:** One interim analysis of DFS is planned on the  
1896 basis of the results of the regular follow-up at 12 months after the  
1897 completion of enrolment. This interim analysis consists of a  
1898 comparison of the primary endpoint, the DFS, between groups; if  
1899 significant differences are found, a secondary endpoint, OS, will be  
1900 likewise compared between the groups. To maintain the primary  
1901 errors in the whole study at a level of 5% (with two sided), the  
1902 multiplicity in the primary endpoint analysis was adjusted using the

1903 Lan–DeMets alpha spending function with an O’Brien–Fleming  
1904 boundary method. The p–value will be 0.003 for the interim DFS  
1905 analyses, and 0.047 for final DFS analysis [1-5].

1906

### 1907 **3. RANDOMIZATION**

1908 After verification of the inclusion and exclusion criteria, eligible  
1909 patients will be randomized using the method of stratified permuted  
1910 blocks to receive metronomic capecitabine maintenance treatment  
1911 or observation. Patients will be stratified according to lymph node  
1912 status (negative vs. positive). A computerized number generator  
1913 using Software SAS (version 8.01) generated a randomization table,  
1914 the results of which were placed in sequentially numbered opaque  
1915 envelopes and remained concealed until after enrollment.

1916

### 1917 **4. STATISTICAL METHODS**

#### 1918 **4.1 Analysis populations**

##### 1919 **4.1.1 Full Analysis Set (FAS) Population**

1920 The Full Analysis Set (FAS) is defined as all randomized patients  
1921 excluding those who withdraw informed consent before protocol  
1922 treatment, or who had no follow–up data after randomization. The  
1923 primary analysis population for all efficacy endpoints will be the

1924 FAS population.

1925

#### 1926 **4.1.2 Per–Protocol Set (PPS) Population**

1927 The Per Protocol Set (PPS) is defined as all randomized patients  
1928 who have completed the study without major protocol violations,  
1929 such as patients who discontinue the study across the protocol  
1930 treatment for reasons determined to be unrelated to breast cancer  
1931 treatment, and patients who refuse any follow–up or visit, not  
1932 including breast cancer recurrence or death.

1933

#### 1934 **4.1.3 Safety Population**

1935 The Safety Analyses Set (SAS) is defined as all randomized  
1936 patients who initiate the protocol treatment.

1937

### 1938 **4.2 Efficacy Analysis**

1939 The following sections outline the planned analysis of the primary  
1940 and secondary efficacy endpoints of this study. All efficacy analysis  
1941 will be performed based on the FAS population.

1942

#### 1943 **4.2.1 Analysis of the Primary Endpoint**

1944 The primary endpoint is DFS, defined as the time from

- 1945 randomization to the first occurrence of the following events:
- 1946 1) Relapse of breast cancer in the ipsilateral chest wall and  
1947 regional lymph nodes
  - 1948 2) Distant metastases (histologically confirmed or clinically  
1949 diagnosed)
  - 1950 3) Breast cancer related, non–breast cancer–related or unknown  
1951 deaths
  - 1952 4) Contralateral breast cancer

1953 Patients who have not had an event at the time of data analysis will  
1954 be censored at the last date they were known to be alive and  
1955 event–free.

1956 The null hypothesis for the primary endpoint is that the survival  
1957 distributions of DFS in the two treatment groups are the same. The  
1958 alternative hypothesis is that the survival distributions of DFS in the  
1959 treatment and the control arm are different:

1960  $H_0: S_{\text{capecitabine}} = S_{\text{observation}}$  vs.  $H_1: S_{\text{capecitabine}} \neq S_{\text{observation}}$

1961 We will estimate survival curves in each treatment arm using the  
1962 Kaplan–Meier estimator and the hazard ratio with 95%CI between  
1963 treatment arms based on the proportional hazards model, with  
1964 assumptions of proportional hazards confirmed based on the  
1965 Schoenfeld residuals for the final dataset. We will use a two–sided

1966 log-rank test at the final analysis (at a significance level of 0.047).

1967 Stratified analyses of the lymph node status will also be conducted.

1968

#### 1969 **4.2.2 Analysis of the Secondary Endpoints**

1970 The Secondary Endpoints are defined as follows:

1971 Overall Survival (OS) is defined as the time from randomization to  
1972 death caused by any reason. Patients who are alive (including lost  
1973 to follow-up) at the time of the analysis will be censored at the date  
1974 when they were last known to be alive.

1975 Distant disease-free survival (DDFS) is defined as the time from  
1976 randomization to the first occurrence of any of the following events:  
1977 Distant metastases, death caused by any reason, and contralateral  
1978 invasive breast cancer. Patients who have not had a distant  
1979 recurrence event at the time of data analysis will be censored at the  
1980 date when they were last known to be alive.

1981 Locoregional recurrence-free survival (LRFS) is defined as the  
1982 time from randomization to the first occurrence of any of the  
1983 following events: ipsilateral breast or chest wall, regional lymph  
1984 node, and death caused by any reason.

1985 The primary analyses for all secondary endpoints will be performed  
1986 at the time of the primary analysis of the primary endpoint DFS. The

1987 estimated Kaplan–Meier curves and the hazard ratio with 95% CI  
1988 will be calculated based on the proportional hazards model and the  
1989 endpoints will be compared using a two–sided log–rank test (at a  
1990 significance level of 0.05).

1991

#### 1992 **4.2.3 Subgroup Analysis**

1993 At the time of the primary analysis, exploratory analyses will be  
1994 performed for DFS to determine whether the magnitude of the  
1995 effectiveness of the addition of capecitabine maintenance might  
1996 differ according to patient sub–populations.

1997 Variables to be considered for defining subgroups of interest  
1998 include the node status as well as other disease– or patient–related  
1999 prognostic or predictive factors. We will conduct the subgroup  
2000 analysis by estimating the hazard ratio with 95% CI and the test  
2001 interaction, if applicable, among subgroups with two–sided  
2002 p–values) for the following items:

2003 ✓ Age ( $\leq 40$  /  $> 40$  and median and range)

2004 ✓ Tumor size at diagnosis (T1 / T2 / T3)

2005 ✓ Histological grade (I / II / III)

2006 ✓ Nodal stage (N0 / N+)

2007 ✓ Stage (I / II / III)

- 2008 ✓ KI-67 ( $\leq 14\%$  /  $> 14\%$ )
- 2009 ✓ Lymphovascular invasion (positive / negative)
- 2010 ✓ Neo-/adjuvant regimens (anthracycline-based/  
2011 taxane-based/ anthracycline- and taxane-based)
- 2012 The above background variables will be compared using statistical  
2013 test (at a two-sided significance level of 0.05).

2014

#### 2015 **4.2.4 Exploratory Analysis**

2016 In the capecitabine arm, a tabulation of those patients who have  
2017 completed the protocol as planned against those who did not  
2018 complete the protocol as planned will be performed. Completion/  
2019 reduction/stop numbers and proportion of capecitabine are  
2020 calculated at every 3-month visit, to show relative dose intensity  
2021 (RDI) of capecitabine, which is defined as the actual cumulative  
2022 dose compared to planned total dose.

2023 To determine the relationship between the RDI of capecitabine and  
2024 DFS, estimated Kaplan-Meier curves and the hazard ratio with 95%  
2025 CI will be calculated based on the proportional hazards model and  
2026 the comparison will be tested using a two-sided log-rank test (at a  
2027 significance level of 0.05).

2028



2029 **4.3 Safety Analyses**

2030 Safety data will be summarized based on the Safety Population.

2031 Verbatim descriptions of treatment–emergent adverse events (AEs)  
2032 will be mapped to MedDRA thesaurus terms and graded according  
2033 to NCI–CTCAE version 4.0. All AEs, including serious adverse  
2034 events (SAEs), will be summarized by treatment arm and  
2035 NCI–CTCAE grade. Comparisons between treatment groups will  
2036 use the chi squared test (grade0–2/grade3–4) with a two–sided  
2037 p–value (at a significance level of 0.05). The variables to be tested  
2038 are:

- 2039 ✓ White blood cell count
- 2040 ✓ Neutrophil count
- 2041 ✓ Platelet count
- 2042 ✓ Hemoglobin
- 2043 ✓ AST
- 2044 ✓ ALT
- 2045 ✓ Total Bilirubin
- 2046 ✓ Creatinine
- 2047 ✓ Appetite loss
- 2048 ✓ Abdominal pain / Diarrhea
- 2049 ✓ Nausea

- 2050 ✓ Vomiting
- 2051 ✓ Stomatitis
- 2052 ✓ Fatigue
- 2053 ✓ Hand-foot syndrome (HFS)

2054

## 2055 **5. REFERENCES**

- 2056 1. Chow, S.C.; Shao, J.; Wang, H. 2003. Sample Size Calculations  
2057 in Clinical Research. Marcel Dekker. New York.
- 2058 2. Lan, K.K.G. and DeMets, D.L. 1983. 'Discrete sequential  
2059 boundaries for clinical trials.' *Biometrika*, 70, pages 659-663.
- 2060 3. O'Brien, P.C. and Fleming, T.R. 1979. 'A multiple testing  
2061 procedure for clinical trials.' *Biometrics*, 35, pages 549-556.
- 2062 4. Pocock, S.J. 1977. 'Group sequential methods in the design and  
2063 analysis of clinical trials.' *Biometrika*, 64, pages 191-199.
- 2064 5. Reboussin, D.M., DeMets, D.L., Kim, K, and Lan, K.K.G. 1992.  
2065 'Programs for computing group sequential boundaries using the  
2066 Lan-DeMets Method.' Technical Report 60, Department of  
2067 Biostatistics, University of Wisconsin-Madison.

2068

2069

2070

## STATISTICAL ANALYSIS PLAN

2071

**TITLE:** A MULTICENTER, PHASE III  
RANDOMIZED STUDY OF  
METRONOMIC CAPECITABINE  
MAINTENANCE AFTER  
STANDARD TREATMENT IN  
PATIENTS WITH OPERABLE  
TRIPLE-NEGATIVE BREAST  
CANCER

**PROTOCOL NUMBER:** SYSUCC-EBC-CHEMO-001

**STUDY DRUG:** Capecitabine

**PLAN PREPARED BY:** Ying Guo and Ji-Bin Li

**PLAN VERSION:** 3.0

**APPROVAL DATE:** January 19, 2017

2072

2073

2074  
2075  
2076  
2077  
2078  
2079  
2080  
2081  
2082  
2083  
2084  
2085  
2086  
2087  
2088  
2089  
2090  
2091  
2092  
2093  
2094  
2095

## CONTENTS

|                                                        |     |
|--------------------------------------------------------|-----|
| <b>1. Background</b> .....                             | 109 |
| <b>2. Study Design</b> .....                           | 109 |
| <b>3. Randomization</b> .....                          | 110 |
| <b>4. Statistical Methods</b> .....                    | 111 |
| <b>4.1 Analysis Populations</b> .....                  | 111 |
| <b>4.1.1 Full Analysis Set (FAS) Population</b> .....  | 111 |
| <b>4.1.2 Per-Protocol Set (PPS) Population</b> .....   | 111 |
| <b>4.1.3 Safety Population</b> .....                   | 112 |
| <b>4.2 Efficacy Analysis</b> .....                     | 112 |
| <b>4.2.1 Analysis of the Primary Endpoint</b> .....    | 112 |
| <b>4.2.2 Analysis of the Secondary Endpoints</b> ..... | 113 |
| <b>4.2.3 Subgroup Analysis</b> .....                   | 115 |
| <b>4.2.4 Exploratory Analysis</b> .....                | 116 |
| <b>4.3 Safety Analysis</b> .....                       | 116 |
| <b>5. References</b> .....                             | 118 |

2096 **1. BACKGROUND**

2097 The SYSUCC–001 trial is a multicenter, phase III, randomized  
2098 controlled study to compare the efficacy and safety of metronomic  
2099 capecitabine maintenance for one year with observation after  
2100 standard local and systemic treatment in patients with operable  
2101 triple negative breast cancer (TNBC).

2102 The primary objective of this study is to evaluate whether the  
2103 addition of metronomic capecitabine maintenance to standard  
2104 treatment improves disease–free survival (DFS), compared with  
2105 standard treatment alone. Secondary objectives include  
2106 determining whether the addition of metronomic capecitabine  
2107 maintenance to standard treatment could improve overall survival  
2108 (OS), distant disease–free survival (DDFS), locoregional  
2109 recurrence–free survival (LRFS) and safety.

2110 The purpose of this Statistical Analysis Plan (SAP) is to provide the  
2111 details of the proposed analyses of the data collected during this  
2112 trial.

2113

2114 **2. STUDY DESIGN**

2115 The SYSUCC–001 trial is a multicenter, phase III, randomized  
2116 controlled study. A total of 424 patients will be enrolled from

2117 approximately 13 sites in China. Eligible patients will be  
2118 randomized between the two study arms in a 1:1 ratio.

2119

2120 The sample size of the study is primarily driven by the analysis of  
2121 DFS. To detect a hazard ratio (HR) of 0.58 in DFS (an estimated  
2122 improvement of 12% in the 5-year DFS from 68.0% in the control  
2123 arm to 80.0% in the capecitabine maintenance arm), approximately  
2124 109 DFS events will be required to achieve a statistical power of 80%  
2125 at a 2-sided significance level of 5%. The estimated periods of  
2126 enrollment and follow-up will be 60 and 36 months, respectively.  
2127 After considering a dropout rate of 9%, approximately 424 patients  
2128 (212 patients in each group) will be enrolled in the study [1, 2].

2129 **Interim Analyses:** One interim analysis of DFS is planned on the  
2130 basis of the results of the regular follow-up at 18 months after the  
2131 completion of enrolment. So far, however, the number of events is  
2132 too much lower than expected. This interim analysis is cancelled  
2133 and approved by SYSUCC Ethics Committee. The p-value for final  
2134 DFS analysis will be 0.047 yet.

2135

### 2136 **3. RANDOMIZATION**

2137 After verification of the inclusion and exclusion criteria, eligible

2138 patients will be randomized using the method of stratified permuted  
2139 blocks to receive metronomic capecitabine maintenance treatment  
2140 or observation. Patients will be stratified according to lymph node  
2141 status (negative vs. positive). A computerized number generator  
2142 using Software SAS (version 8.01) generated a randomization table,  
2143 the result of which were placed in sequentially numbered opaque  
2144 envelopes and remained concealed until after enrollment.

2145

#### 2146 **4. STATISTICAL METHODS**

##### 2147 **4.1 Analysis populations**

###### 2148 **4.1.1 Full Analysis Set (FAS) Population**

2149 The Full Analysis Set (FAS) is defined as all randomized patients  
2150 excluding those who withdraw informed consent before protocol  
2151 treatment, or who had no follow-up data after randomization. The  
2152 primary analysis population for all efficacy endpoints will be the  
2153 FAS population.

2154

###### 2155 **4.1.2 Per-Protocol Set (PPS) Population**

2156 The Per Protocol Set (PPS) is defined as all randomized patients  
2157 who have completed the study without major protocol violations,  
2158 such as patients who discontinue the study across the protocol

2159 treatment for reasons determined to be unrelated to breast cancer  
2160 treatment, and patients who refuse any follow-up or visit, not  
2161 including breast cancer recurrence or death.

2162

### 2163 **4.1.3 Safety Population**

2164 The Safety Analyses Set (SAS) is defined as all randomized  
2165 patients who initiate the protocol treatment.

2166

## 2167 **4.2 Efficacy Analysis**

2168 The following sections outline the planned analysis of the primary  
2169 and secondary efficacy endpoints of this study. All efficacy analysis  
2170 will be performed based on the FAS population.

2171

### 2172 **4.2.1 Analysis of the Primary Endpoint**

2173 The primary endpoint is DFS, defined as the time from  
2174 randomization to the first occurrence of the following events:

2175 5) Relapse of breast cancer in the ipsilateral chest wall and  
2176 regional lymph nodes

2177 6) Distant metastases (histologically confirmed or clinically  
2178 diagnosed)

2179 7) Breast cancer related, non-breast cancer related or unknown



2180 deaths

2181 8) Contralateral breast cancer

2182

2183 Patients who have not had an event at the time of data analysis will  
2184 be censored at the last date they were known to be alive and  
2185 event-free.

2186 The null hypothesis for the primary endpoint is that the survival  
2187 distributions of DFS in the two treatment groups are the same. The  
2188 alternative hypothesis is that the survival distributions of DFS in the  
2189 treatment and the control arm are different:

2190  $H_0: S_{\text{capecitabine}} = S_{\text{observation}}$  vs.  $H_1: S_{\text{capecitabine}} \neq S_{\text{observation}}$

2191 We will estimate survival curves in each treatment arm using  
2192 Kaplan–Meier estimator and the hazard ratio with 95%CI between  
2193 treatment arms based on the proportional hazards model, with  
2194 assumptions of proportional hazards confirmed based on the  
2195 Schoenfeld residuals in the final dataset. We will use a two-sided  
2196 log-rank test for the final analysis (at a significance level of 0.047).  
2197 Stratified analyses of the lymph node status will also be conducted.

2198

#### 2199 **4.2.2 Analysis of the Secondary Endpoints**

2200 The Secondary Endpoints are defined as follows:

2201 Overall Survival (OS) is defined as the time from randomization to  
2202 death caused by any reason. Patients who are alive (including lost  
2203 to follow-up) at the time of the analysis will be censored at the date  
2204 when they were last known to be alive.

2205 Distant disease-free survival (DDFS) is defined as the time from  
2206 randomization to the first occurrence of any of the following events:  
2207 distant metastases, death caused by any reason, and contralateral  
2208 invasive breast cancer. Patients who have not had a distant  
2209 recurrence event at the time of data analysis will be censored at the  
2210 date when they were last known to be alive.

2211 Locoregional recurrence-free survival (LRFS) is defined as the  
2212 time from randomization to the first occurrence of any of the  
2213 following events: ipsilateral breast or chest wall, regional lymph  
2214 node, and death caused by any reason.

2215 The primary analyses for all secondary endpoints will be performed  
2216 at the time of the primary analysis of the primary endpoint (DFS).

2217 The estimated Kaplan-Meier curves, and the hazard ratio with 95%  
2218 CI, will be calculated based on the proportional hazards model, and  
2219 the endpoints will be compared using a two-sided log-rank test (at  
2220 a significance level of 0.05).

2221

2222 **4.2.3 Subgroup Analysis**

2223 At the time of the primary analysis, exploratory analyses will be  
2224 performed for DFS to determine whether the magnitude of the  
2225 effectiveness of the addition of capecitabine maintenance might  
2226 differ according to patient sub-populations.

2227 Variables to be considered for defining subgroups of interest  
2228 include the node status as well as other disease- or patient-related  
2229 prognostic or predictive factors. We will conduct the subgroup  
2230 analysis by estimating the hazard ratio with 95%CI and test the  
2231 interaction, if applicable, among subgroups with two-sided p-value  
2232 for the following items:

- 2233 ✓ Age ( $\leq 40$  /  $> 40$  and median and range)
- 2234 ✓ Tumor size at diagnosis (T1 /  $\geq T2$ )
- 2235 ✓ Histological grade (I+II/III)
- 2236 ✓ Nodal stage (N0 / N+)
- 2237 ✓ Stage (I / II / III)
- 2238 ✓ Ki-67 ( $< 30\%$  /  $\geq 30\%$ )
- 2239 ✓ Lymphovascular invasion (positive / negative)
- 2240 ✓ Neo-/adjuvant regimens (anthracycline- or taxane-based/  
2241 anthracycline- and taxane-based)

2242 The above background variables will be compared using statistical

2243 test (two-sided significance level is 0.05).

2244

#### 2245 **4.2.4 Exploratory Analysis**

2246 In the capecitabine arm, a tabulation of those patients who have

2247 completed the protocol as planned against those who did not

2248 complete the protocol as planned will be perform. Completion /

2249 reduction / stop numbers and proportion of capecitabine are

2250 calculated at every 3-months visit to show the relative dose

2251 intensity (RDI) of capecitabine, which is defined as the actual

2252 cumulative dose compared to planned total dose.

2253 To determine the relationship between the RDI of capecitabine and

2254 DFS, estimated Kaplan–Meier curves and the hazard ratio with 95%

2255 CI will be calculated based on the proportional hazards model and

2256 the comparison will be tested using a two-sided log–rank test (at a

2257 significance level of 0.05).

2258

#### 2259 **4.3 Safety Analyses**

2260 Safety data will be summarized based on the Safety Population.

2261 Verbatim descriptions of treatment–emergent adverse events (AEs)

2262 will be mapped to MedDRA thesaurus terms and graded according

2263 to NCI–CTCAE version 4.0. All AEs, including serious adverse

2264 events (SAEs), will be summarized by treatment arm and  
2265 NCI-CTCAE grade. Comparisons between treatment groups will  
2266 use the chi squared test (grade0-2/grade3-5(4)) with a two-sided  
2267 p-value (at a significance level of 0.05). The variables to be tested  
2268 are:

- 2269 ✓ White blood cell count
- 2270 ✓ Neutrophil count
- 2271 ✓ Platelet count
- 2272 ✓ Hemoglobin
- 2273 ✓ AST
- 2274 ✓ ALT
- 2275 ✓ Total Bilirubin
- 2276 ✓ Creatinine
- 2277 ✓ Appetite loss
- 2278 ✓ Abdominal pain / Diarrhea
- 2279 ✓ Nausea
- 2280 ✓ Vomiting
- 2281 ✓ Stomatitis
- 2282 ✓ Fatigue
- 2283 ✓ Hand-foot syndrome (HFS)

2284

2285

2286 **5. REFERENCES**

2287 1. Lakatos, Edward. 1988. 'Sample Sizes Based on the Log-Rank  
2288 Statistic in Complex Clinical Trials', Biometrics, Volume 44,  
2289 March, pages 229-241.

2290 2. Lakatos, Edward. 2002. 'Designing Complex Group Sequential  
2291 Survival Trials', Statistics in Medicine, Volume 21, pages  
2292 1969-1989.

2293

2294

2295

## SYSUCC–001 Statistical Analysis Plan Amendment List

2296

| page     | item                    | before amendment (ver. 2.0)                                                                 | after amendment (ver.3.0)                                                                                                                                                                                |
|----------|-------------------------|---------------------------------------------------------------------------------------------|----------------------------------------------------------------------------------------------------------------------------------------------------------------------------------------------------------|
| Cover    | Cover                   | Version 2.0 approved date: November 30, 2012                                                | Version 3.0 approved date: January 19, 2017                                                                                                                                                              |
| Page 107 | 2. STUDY DESIGN         | (None)                                                                                      | So far, however, the number of events is too much lower than expected. This interim analysis is cancelled and approved by SYSUCC Ethics Committee. The p–value for final DFS analysis will be 0.047 yet. |
| Page 112 | 4.2.3 Subgroup Analysis | Tumor size at diagnosis (T1 /T2/T3)                                                         | Tumor size at diagnosis (T1 / >=T2)                                                                                                                                                                      |
| Page 112 | 4.2.3 Subgroup Analysis | Histological grade ( I /II/III)                                                             | Histological grade ( I + II/III)                                                                                                                                                                         |
| Page 112 | 4.2.3 Subgroup Analysis | KI–67 (≤14% / >14%)                                                                         | KI–67 (<30% / ≥30%)                                                                                                                                                                                      |
| Page 112 | 4.2.3 Subgroup Analysis | Neo-/adjuvant regimens (anthracycline–based/ taxane–based/ anthracycline– and taxane–based) | Neo-/adjuvant regimens (anthracycline– or taxane–based/ anthracycline– and taxane–based)                                                                                                                 |

2297

2298

| <b>page</b> | <b>item</b>     | <b>before amendment (ver. 1.0)</b>                                                                                                                                                                                                    | <b>after amendment (ver.2.0)</b>                                                                                                                                                                                                     |
|-------------|-----------------|---------------------------------------------------------------------------------------------------------------------------------------------------------------------------------------------------------------------------------------|--------------------------------------------------------------------------------------------------------------------------------------------------------------------------------------------------------------------------------------|
| Cover       | Cover           | Version 1.0 approved date: April 5, 2010                                                                                                                                                                                              | Version 2.0 approved date: November 30, 2012                                                                                                                                                                                         |
| Page 96     | 2. STUDY DESIGN | A total of 684 patients will be enrolled from approximately 18 sites in China.                                                                                                                                                        | A total of 424 patients will be enrolled from approximately 13 sites in China.                                                                                                                                                       |
| Page 96     | 2. STUDY DESIGN | Approximately 148 DFS events will be required to achieve 90% power at a 2–sided significance level of 5%. The estimated period of enrollment and follow–up will be 48 and 36 months, respectively. After considering 20% dropout rate | Approximately 109 DFS events will be required to achieve 80% power at a 2–sided significance level of 5%. The estimated period of enrollment and follow–up will be 60 and 36 months, respectively. After considering 9% dropout rate |
| Page 96     | 2. STUDY DESIGN | One interim analysis of DFS is planned on the basis of the results of the regular follow–up study 12 months after the completion of enrolment.                                                                                        | One interim analysis of DFS is planned on the basis of the results of the regular follow–up study 18 months after the completion of enrolment.                                                                                       |

2299

2300
