# Supplementary material
Source: PubMed Central journal article supplement (PMC7729589)
Supplement: jama-e2023370-s002.pdf [file jama-e2023370-s002.pdf]

## Supplemental Online Content

Wang X, Wang S-S, Huang H, et al; South China Breast Cancer Group. Effect of capecitabine maintenance therapy using lower dosage and higher frequency vs observation on disease-free survival among patients with early-stage triple-negative breast cancer who had received standard treatment: the SYSUCC-001 randomized clinical trial. *JAMA*. Published online December 10, 2021.  
doi:10.1001/jama.2020.23370

**eFigure.** Effect of Different Node Status on Outcomes

**eTable.** Disease-Free Survival Events in 434 Patients With TNBC

This supplemental material has been provided by the authors to give readers additional information about their work.

**eFigure. Effect of Different Node Status on Outcomes**

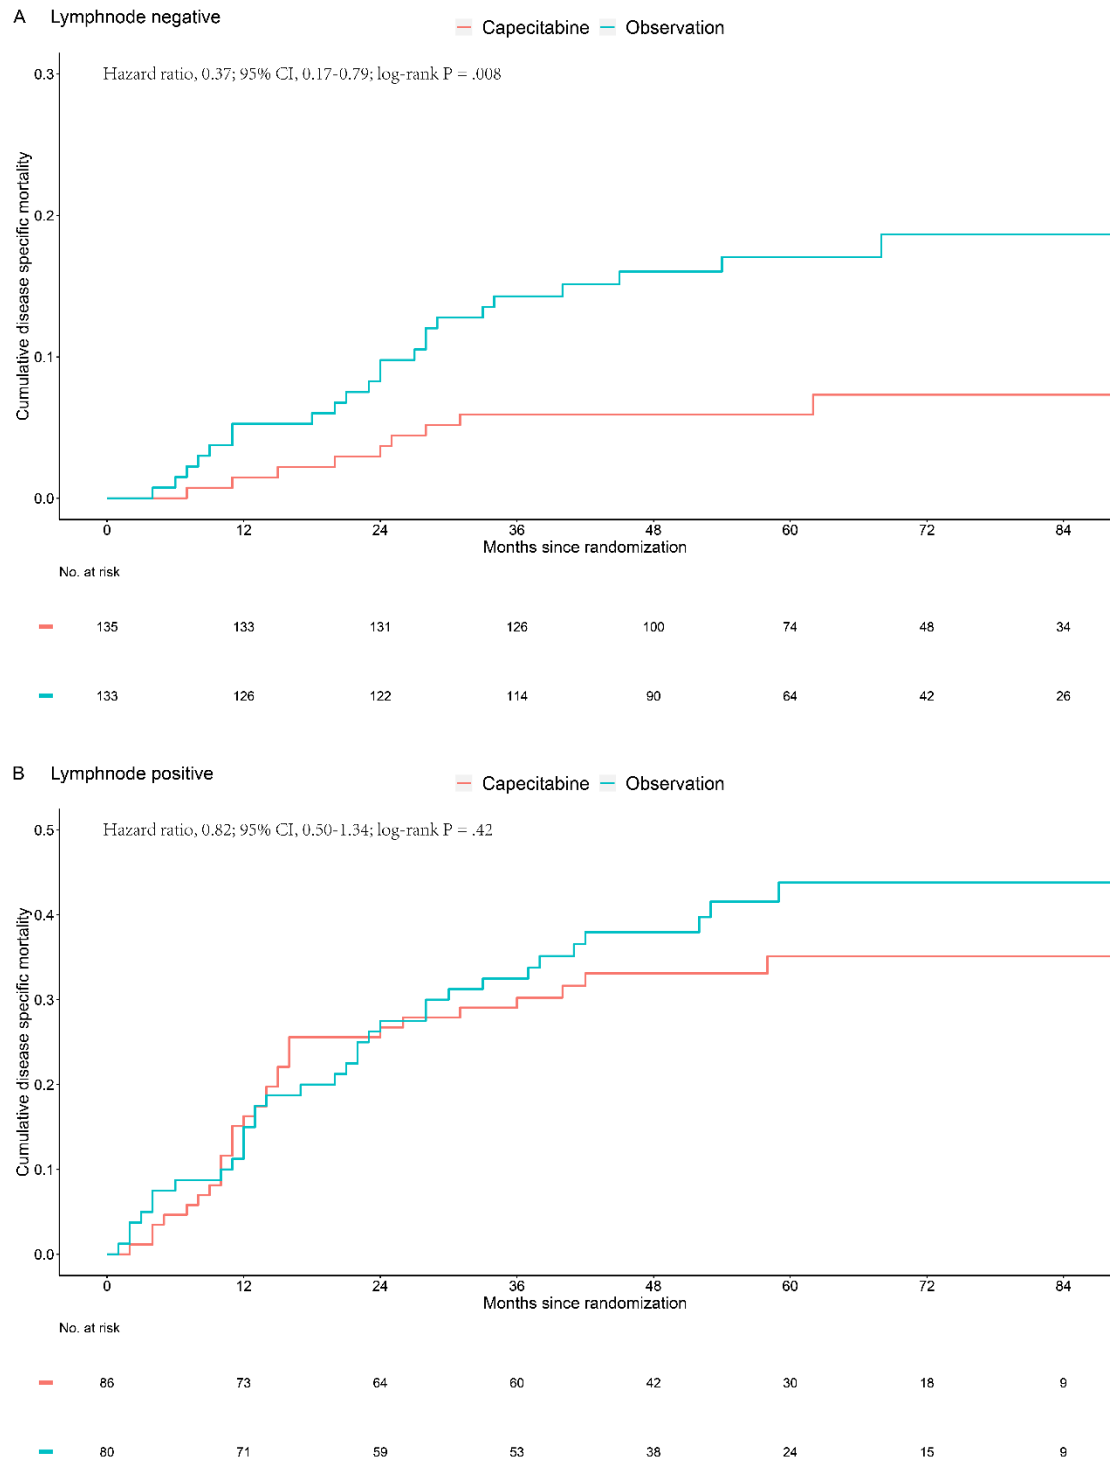

Panel A: in the Subgroup of Patients with Node Negative Disease.

Panel B: in the Subgroup of Patients with Node Positive Disease.

**eTable.** Disease-Free Survival Events in 434 Patients with TNBC

|                                         | <b>Capecitabine group<br/>(n=221)</b> | <b>Observation group<br/>(n=213)</b> |
|-----------------------------------------|---------------------------------------|--------------------------------------|
| DFS event, n (%)                        | 38 (17.2)                             | 56 (26.3)                            |
| Locoregional invasive recurrence only   | 6 (2.7)                               | 6 (2.8)                              |
| Distant recurrence only                 | 26 (11.8)                             | 34 (16.0)                            |
| Locoregional and distant recurrence     | 5 (2.3)                               | 15 (7.0)                             |
| Death                                   | 1 (0.5)                               | 1 (0.5)                              |
| Location of distant recurrence, n (%) * |                                       |                                      |
| Bone                                    | 7 (3.2)                               | 19 (8.9)                             |
| Lung                                    | 12 (5.4)                              | 25 (11.7)                            |
| Liver                                   | 6 (2.7)                               | 12 (5.6)                             |
| Brain                                   | 12 (5.4)                              | 11 (5.2)                             |
| Other **                                | 3 (1.4)                               | 2 (0.9)                              |

\* The location of distant recurrence is not exclusive.

\*\* Other sites included contralateral invasive breast cancer, the ovarian, pleura and peritoneum.
