# Supplementary material
Source: PubMed Central journal article supplement (PMC7729589)
Supplement: jama-e2023370-s003.pdf [file jama-e2023370-s003.pdf]

## Data Sharing Statement

Wang. Effect of Capecitabine Maintenance Therapy Using Lower Dosage and Higher Frequency vs Observation on Disease-Free Survival Among Patients With Early-Stage Triple-Negative Breast Cancer Who Had Received Standard Treatment. *JAMA*. Published December 10, 2020. doi:10.1001/jama.2020.23370

### Data

**Data available:** No

### Additional Information

**Explanation for why data not available:** Key raw data are available at the Research Data Deposit platform ([www.researchdata.org.cn](http://www.researchdata.org.cn)), with the approval RDD number of RDDA2020001515

Research Data Deposit (RDD) is a comprehensive platform for medical researchers to file their research data and research records to help ensure the authenticity of their research projects. Therefore, RDD is not an open data platform.
